# Supplementary material for: Oxo-rhenium catalyzed reductive coupling and deoxygenation of alcohols
Source: Royal Society of Chemistry journal article supplement (doi:10.1039/c6cc00537c), 2016-01-01
Supplement: c6cc00537c1.pdf [file c6cc00537c1.pdf]

Supporting information for  
Oxo-Rhenium Catalyzed Deoxygenation and Reductive Coupling of Alcohols

Gabrielle R. Kasner, Camille Boucher-Jacobs, J. Michael McClain III and Kenneth M. Nicholas\*

- |      |                                                     |          |                                                 |
|------|-----------------------------------------------------|----------|-------------------------------------------------|
| S 2  | General procedure and remarks                       | S 14     | NMR Sorbic alcohol reaction mixture             |
| S 3  | NMR Benzhydrol reaction mixture                     | S 15     | GCMS Sorbic alcohol reaction mixture            |
| S 4  | Isolated product from benzhydrol and melting point  | S 16     | NMR Triphenylmethanol reaction mixture          |
| S 5  | NMR Fluorenol reaction mixture                      | S 17     | GCMS Triphenylmethanol reaction mixture         |
| S 6  | GCMS Fluorenol reaction mixture                     | S 18     | NMR Benzoin reaction mixture                    |
| S 7  | NMR Cinnamyl alcohol reaction mixture               | S 19     | GCMS Benzoin reaction mixture (GC Chromatogram) |
| S 8  | Assignment of Ph <sub>2</sub> -hexadiene structures | S 20     | GCMS Benzoin reaction mixture (MS Chromatogram) |
| S 9  | GCMS Cinnamyl alcohol reaction mixture              | S 21     | NMR Benzyl alcohol reaction mixture             |
| S 10 | NMR Benzhydrol/Fluorenol reaction mixture           | S 22     | GC Benzyl alcohol reaction mixture              |
| S 11 | GCSM Benzhydrol/Fluorenol reaction mixture          | S 23- 25 | NMRs Radical Trap experiments                   |
| S 12 | NMR sec-Phenethyl alcohol reaction mixture          | S 25-30  | Computational methods and data for Scheme 4     |
| S 13 | GCMS sec-Phenethyl alcohol reaction mixture         |          |                                                 |

## General procedures and analysis

### Reaction of Alcohols with $\text{PPh}_3/(\text{PPh}_3)_2\text{ReO}_2\text{I}$

0.10 mmol (18.4 mg) of benzhydrol, 0.10 mmol (26.2 mg) of triphenylphosphine, and 11.5 mol% (10 mg) of  $(\text{Ph}_3\text{P})_2\text{IReO}_2$  were added to a thick-walled Ace glass reactor tube containing a magnetic stir bar. 1 mL of benzene was added to the tube. The tube containing the reaction mixture was sealed with a Teflon, front-seal plunger valve and degassed, three times at room temperature with mild vacuum (ca. 60 mmHg) and backfilled with  $\text{N}_2$ . The reactor tube was then placed in an oil bath at 150°C and heated for 24 hours.

#### Analysis :

To determine a yield by NMR, 300  $\mu\text{L}$  of the reaction mixture were dispensed into an NMR tube, along with 5  $\mu\text{L}$  of DMF and ca. 500  $\mu\text{L}$  of  $\text{CDCl}_3$ . A  $^1\text{H}$  NMR spectrum was obtained on a Varian Mercury VX-300 MHz and processed using SpinWorks<sup>1</sup>.

To determine an isolated yield, the reaction was repeated at a 1.0 mmol scale. The reaction mixture was concentrated by rotary evaporation before being added to a silica column. The reaction product was eluted down with dichloromethane, the solvent rotary evaporated and the residue weighed.

### Reaction of Alcohols with $\text{PPh}_3/(\text{PPh}_3)_2\text{ReO}_2\text{I}$

In a typical reaction benzhydrol (1.0 mmol) and  $\text{Bu}_4\text{N}[(\text{salicyl-2-thiophenyl-hydrazide})\text{VO}_2]$  (0.10 mmol) were combined with 5 mL benzene in a glass-lined stainless steel reactor with a magnetic spin bar, then flushed twice and pressurized with CO up to a total pressure of 280 psi (20 atm), and heated at 180 °C for 24h. The reaction mixture was cooled to room temperature, vented (fume hood), and an aliquot removed for  $^1\text{H}$  NMR analysis as described above with 5 mL DMSO added as an integration reference.

1) Marat, K. SpinWorks 4.0.1.0 ed. University of Manitoba: Winnipeg, Canada, 2013.

# SpinWorks 4: STANDARD PROTON PARAMETERS

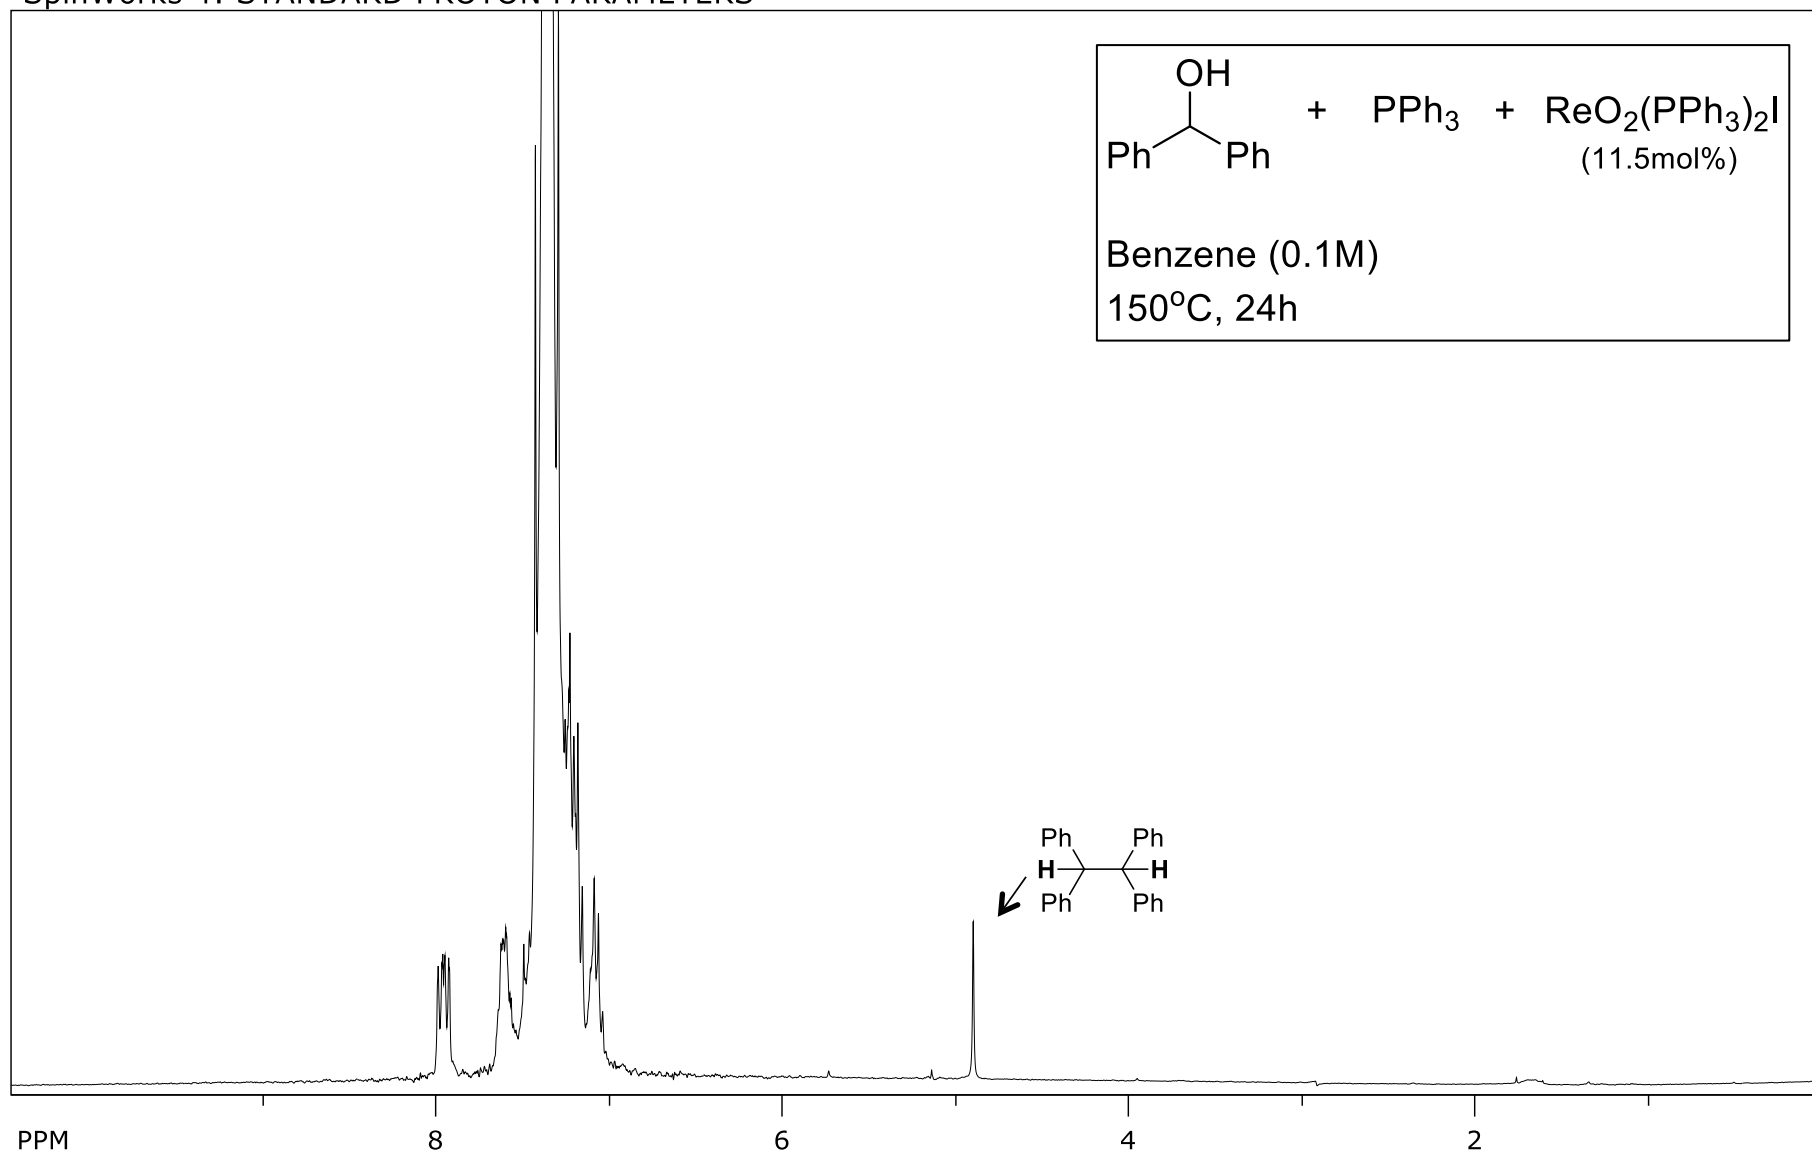

file: ...ocuments\Research\NMR\GK04.fid\fid\_block# 1 expt: "s2pul"  
transmitter freq.: 300.123590 MHz  
time domain size: 16384 points  
width: 4803.07 Hz = 16.0037 ppm = 0.293156 Hz/pt  
number of scans: 64

freq. of 0 ppm: 300.121714 MHz  
processed size: 16384 complex points  
LB: 1.500 GF: 0.0000

Melting point found : 199-200°C

SpinWorks 4: STANDARD PROTON PARAMETERS

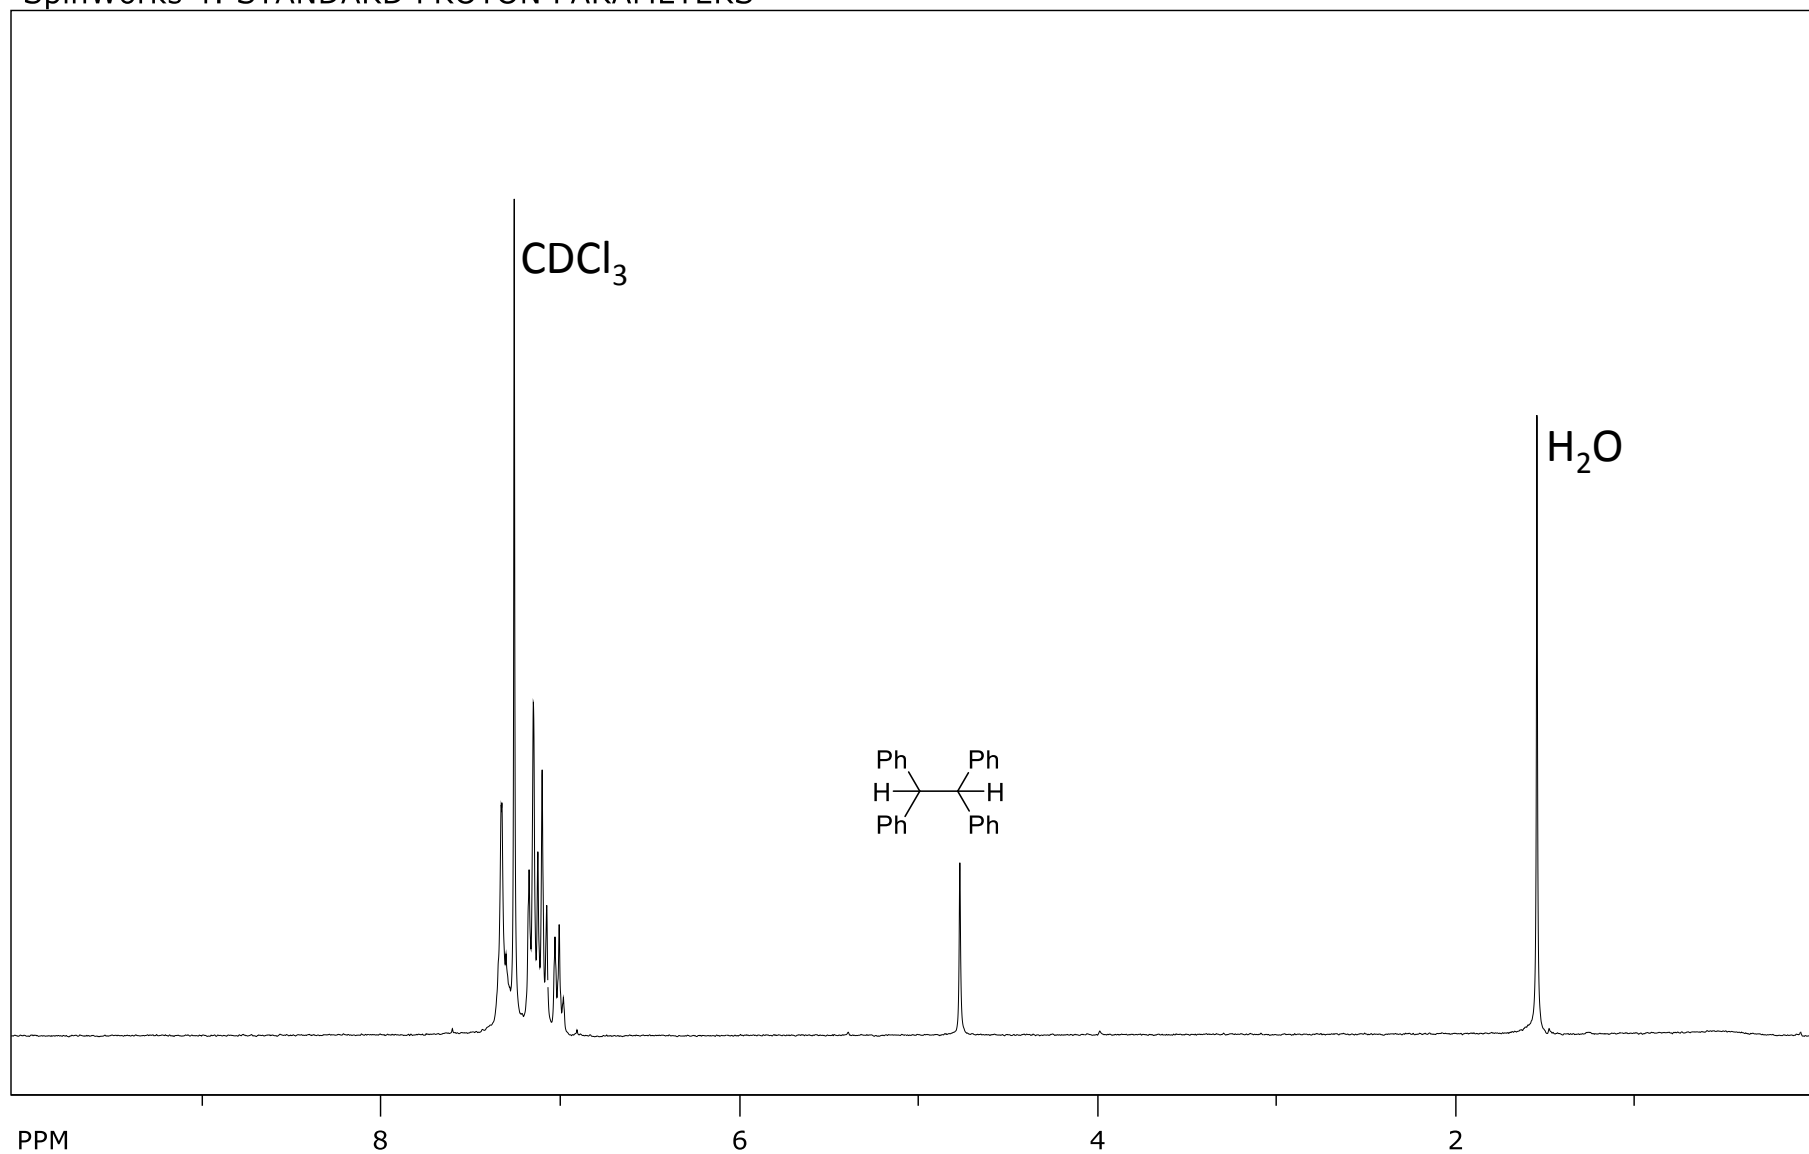

file: ...arch\NMR\GK04isolatedry\_1H.fid\fid block# 1 expt: "s2pul"  
transmitter freq.: 300.123563 MHz  
time domain size: 16384 points  
width: 4803.07 Hz = 16.0037 ppm = 0.293156 Hz/pt  
number of scans: 32

freq. of 0 ppm: 300.121762 MHz  
processed size: 16384 complex points  
LB: 1.500 GF: 0.0000

SpinWorks 4: STANDARD PROTON PARAMETERS;

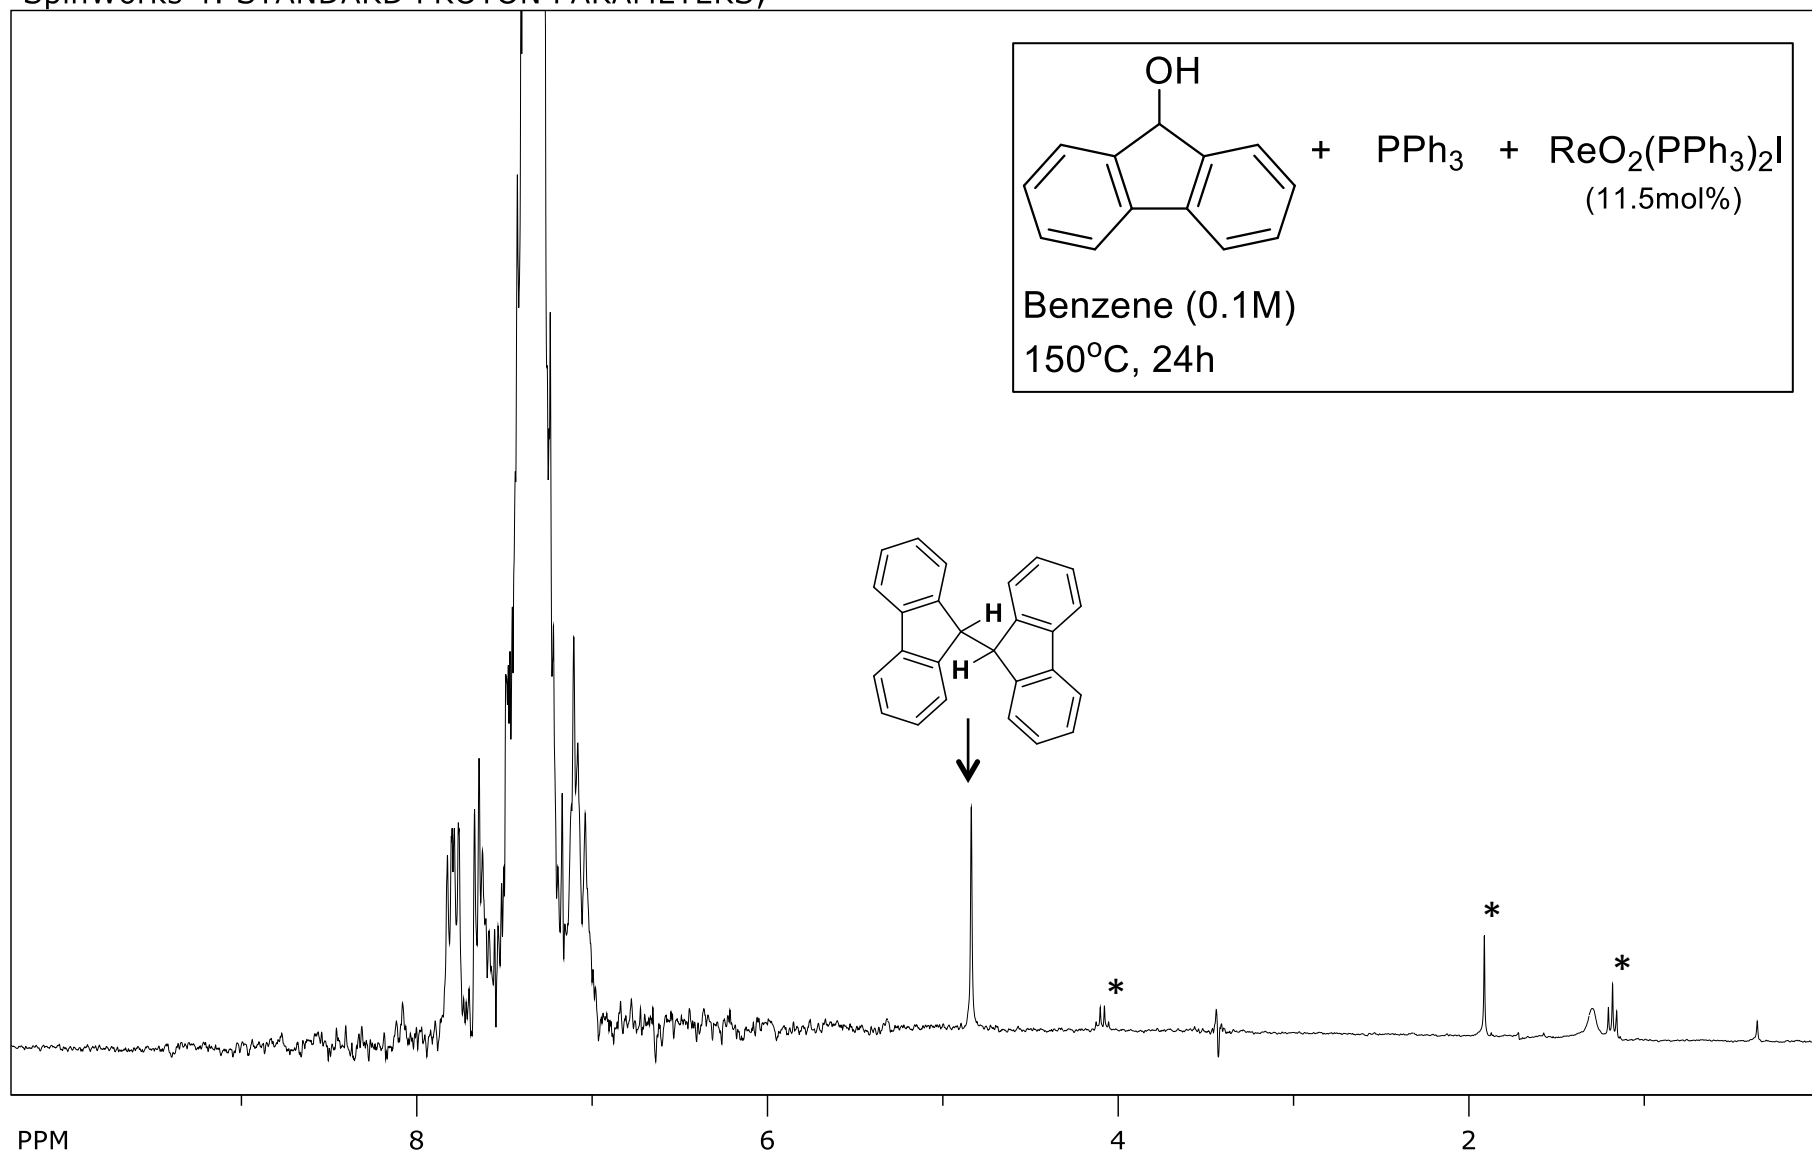

file: ...ments\Research\NMR\GK15\_1H.fid\fid\_block# 1 expt: "s2pul"  
transmitter freq.: 300.123563 MHz  
time domain size: 16384 points  
width: 4803.07 Hz = 16.0037 ppm = 0.293156 Hz/pt  
number of scans: 32

freq. of 0 ppm: 300.121943 MHz  
processed size: 16384 complex points  
LB: 1.500 GF: 0.0000

S5

\*residual ethyl acetate

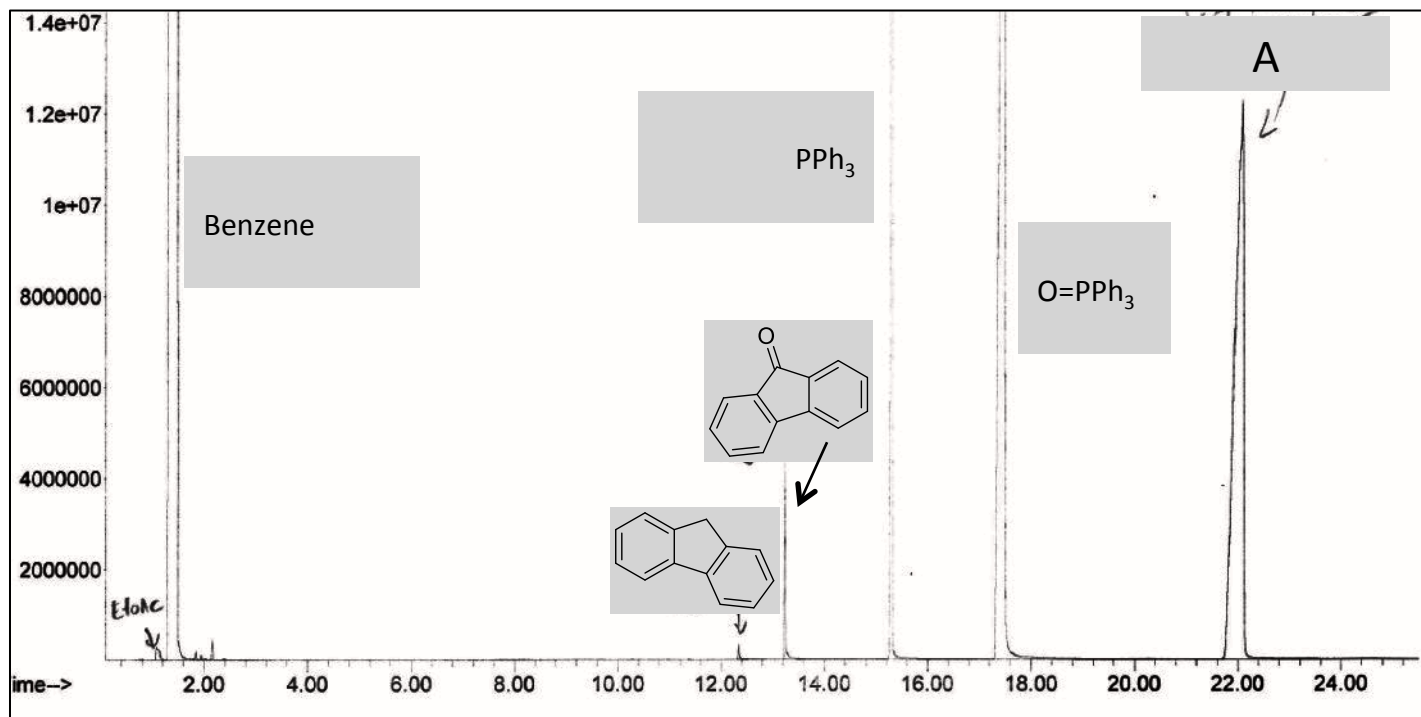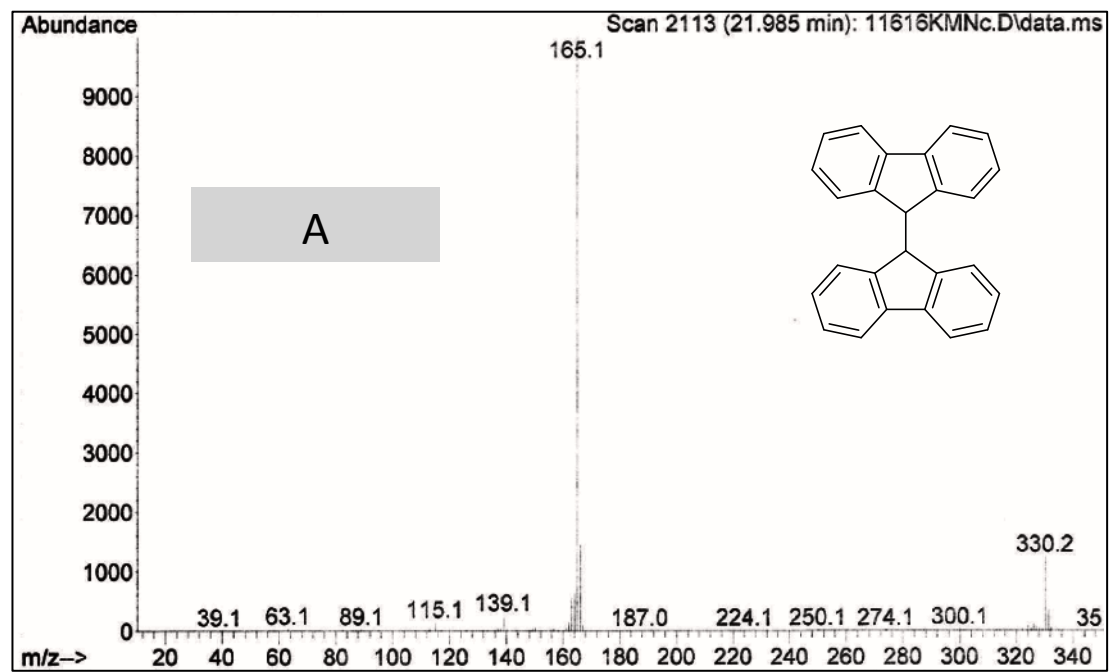

# NMR recorded after the reaction solvent was removed under vacuum

SpinWorks 4: GK-12-dry

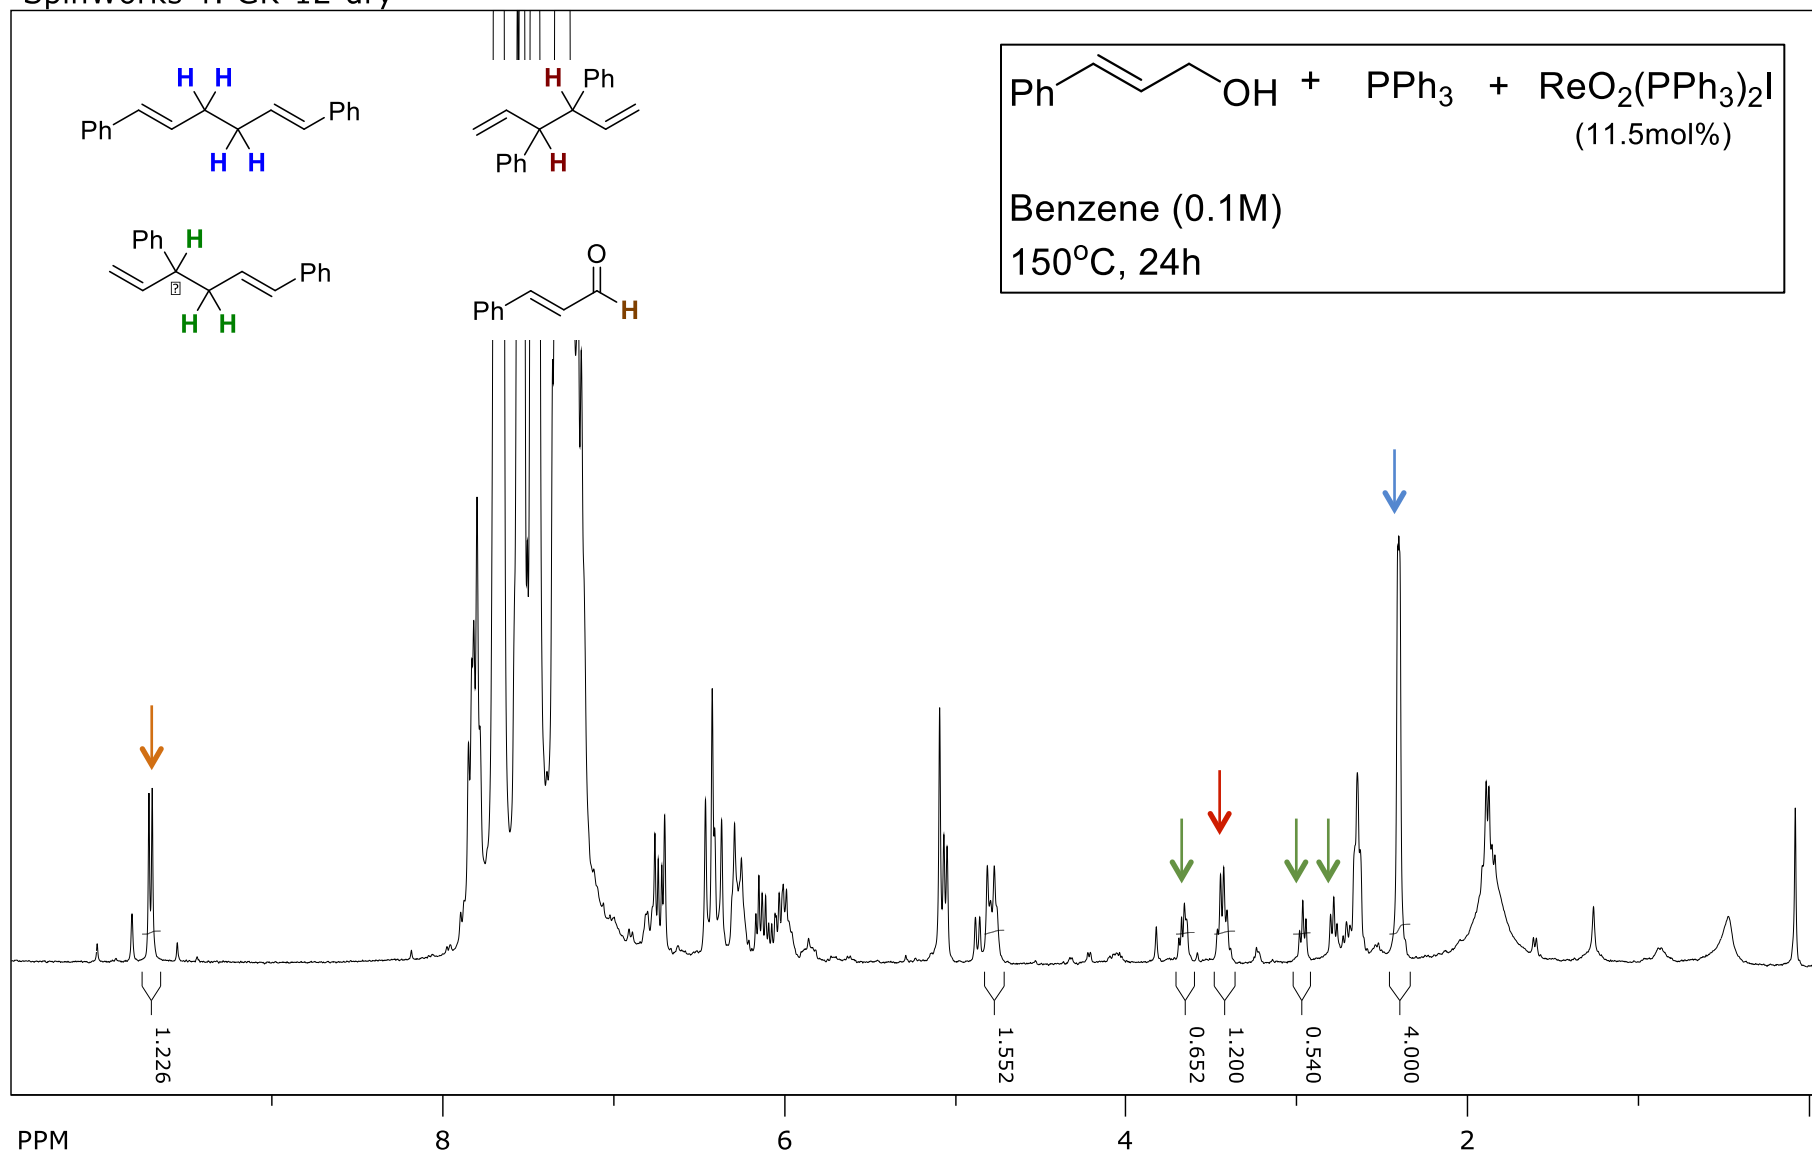

file: ...y15\_01\GK-12-dry\_PROTON\_01.fid\fid\_block# 1 expt: "s2pul"  
 transmitter freq.: 399.868346 MHz  
 time domain size: 32768 points  
 width: 6410.26 Hz = 16.0309 ppm = 0.195626 Hz/pt  
 number of scans: 8

freq. of 0 ppm: 399.865946 MHz  
 processed size: 32768 complex points  
 LB: 1.500 GF: 0.0000

The assignment of product structures from the cinnamyl alcohol reaction is based on comparison of the H-NMR spectrum of the product mixture with the reported spectra for the isomeric dienes (ref below) and with computer simulated NMR spectra.

K. Muraoka, M. Nojima, S. Kusabayashi, S. Nagase, J. CHEM. SOC. PERKIN TRANS. II, 761, 1986.



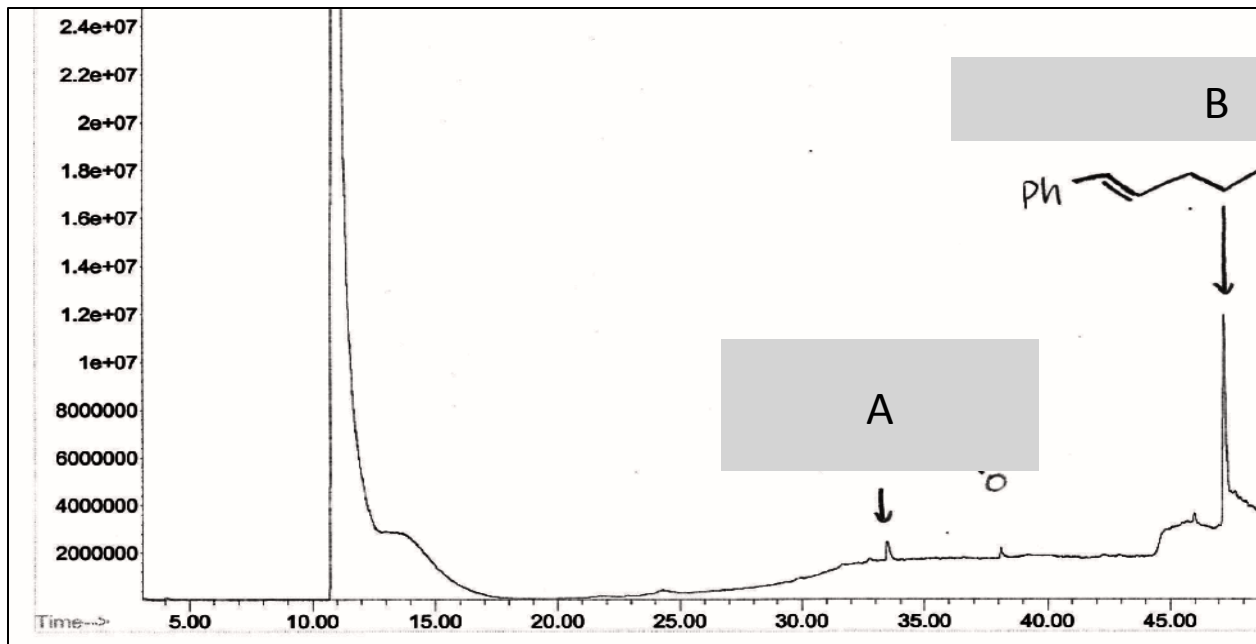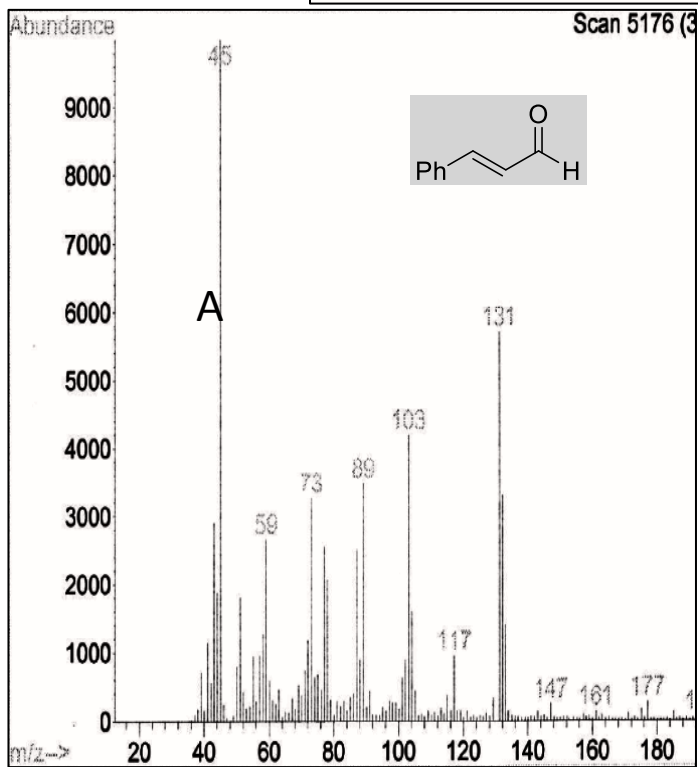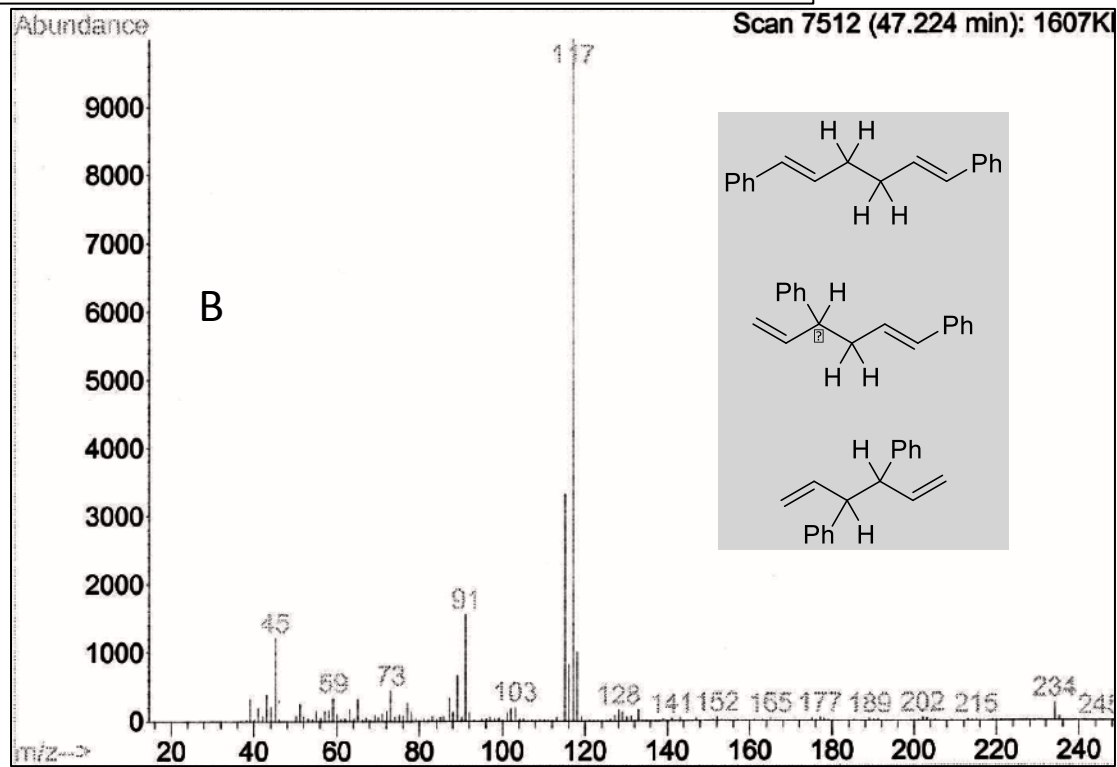

SpinWorks 4: KN315

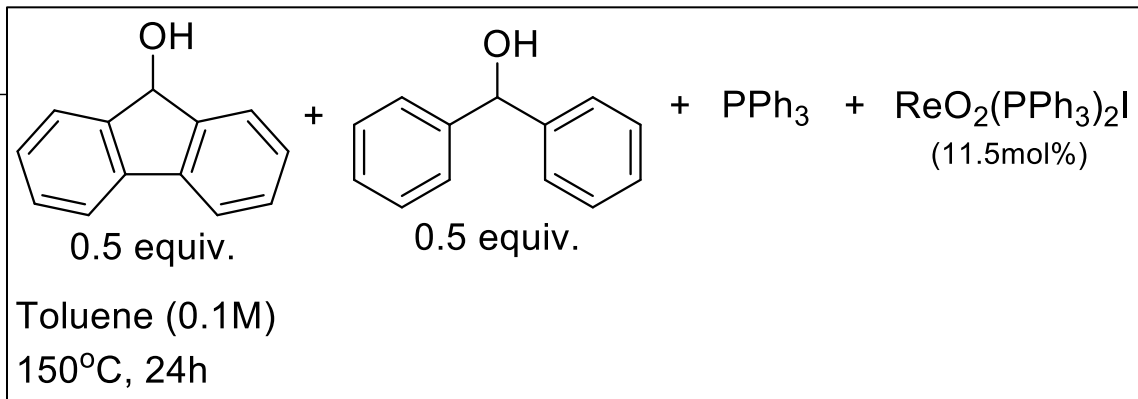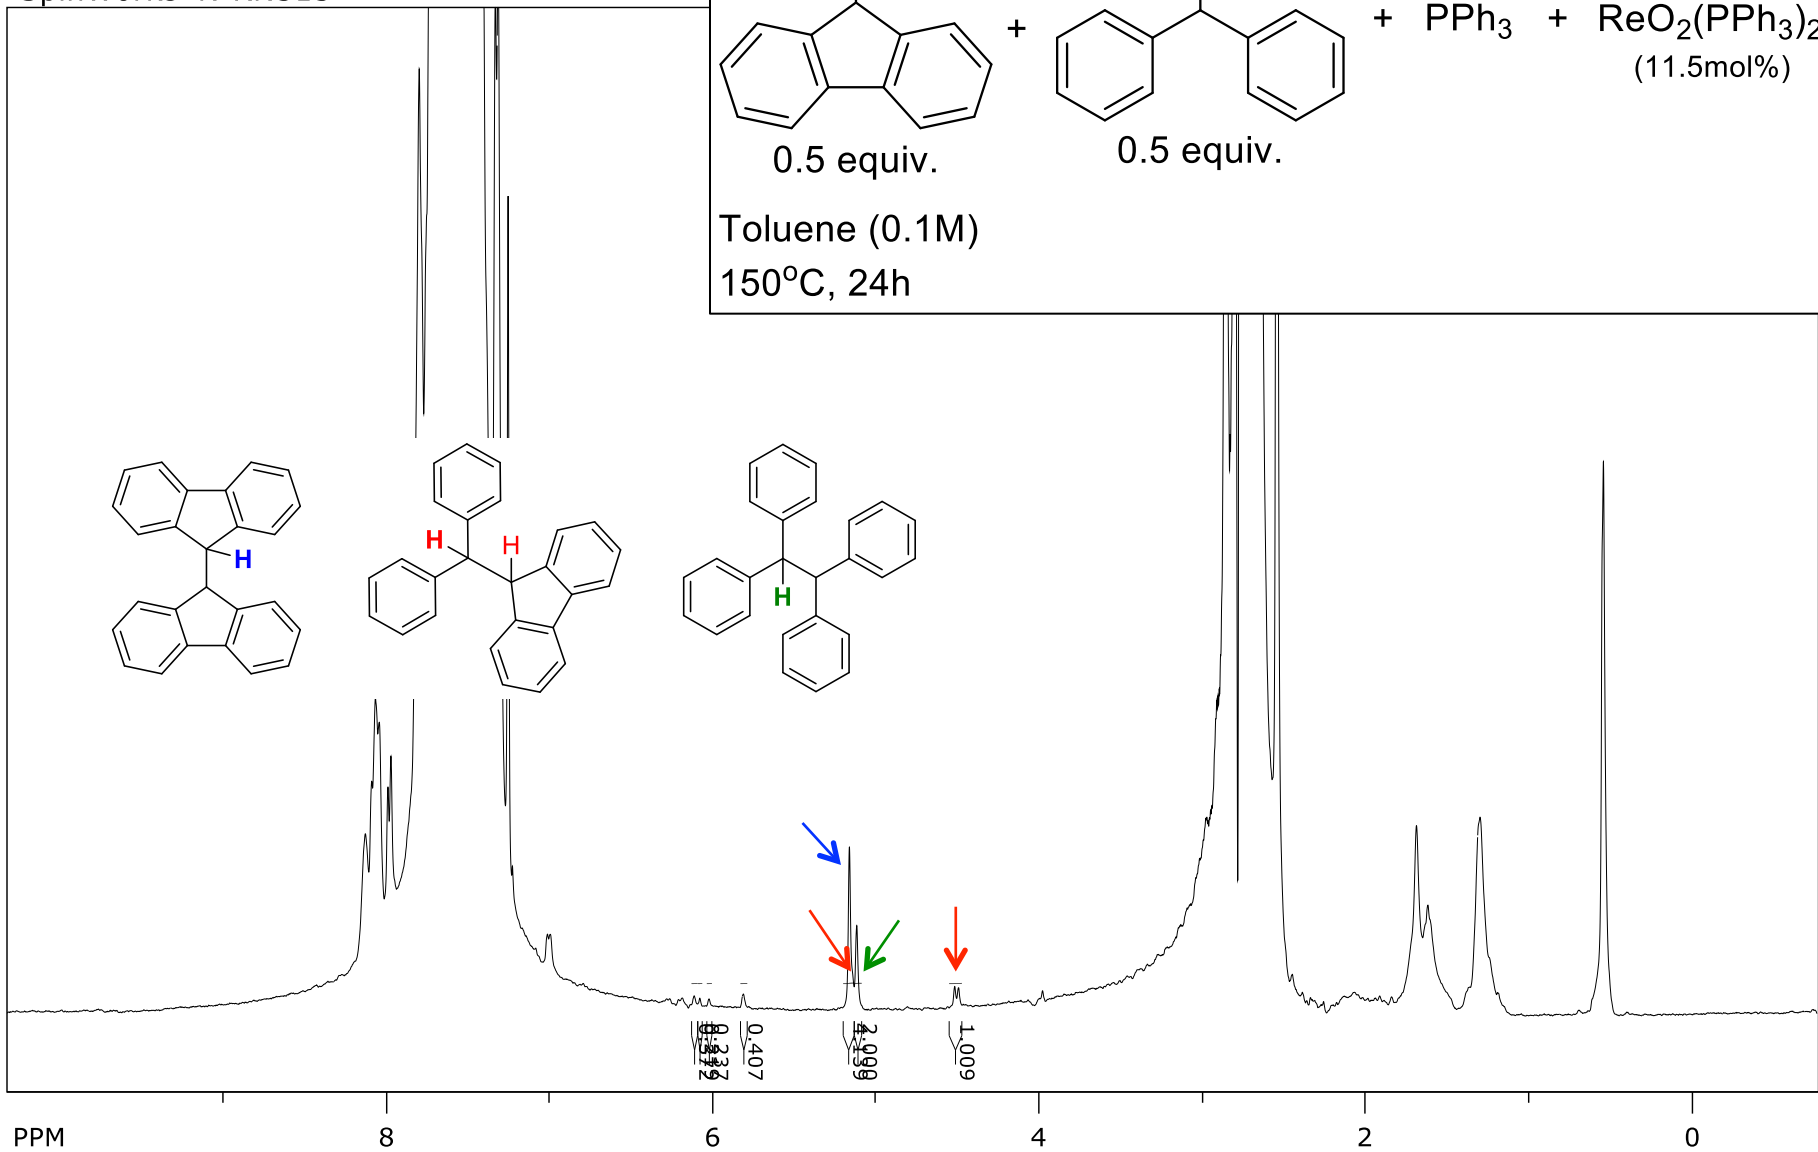

file: ...25Mar16\_01\KN315\_PROTON\_01.fid\fid block# 1 expt: "s2pul"  
transmitter freq.: 399.868346 MHz  
time domain size: 32768 points  
width: 6410.26 Hz = 16.0309 ppm = 0.195626 Hz/pt  
number of scans: 32

freq. of 0 ppm: 399.865946 MHz  
processed size: 32768 complex points  
LB: 1.500 GF: 0.0000

File : Z:\Foster\2016\03\31\11755KMNd.D  
 Operator : aydin  
 Acquired : 1 Apr 2016 10:39 using AcqMethod NICHOLASMETHODAUTOSAMP-3UL.M  
 Instrument : GCMSNavy  
 Sample Name: KN315  
 Misc Info :  
 Vial Number: 2

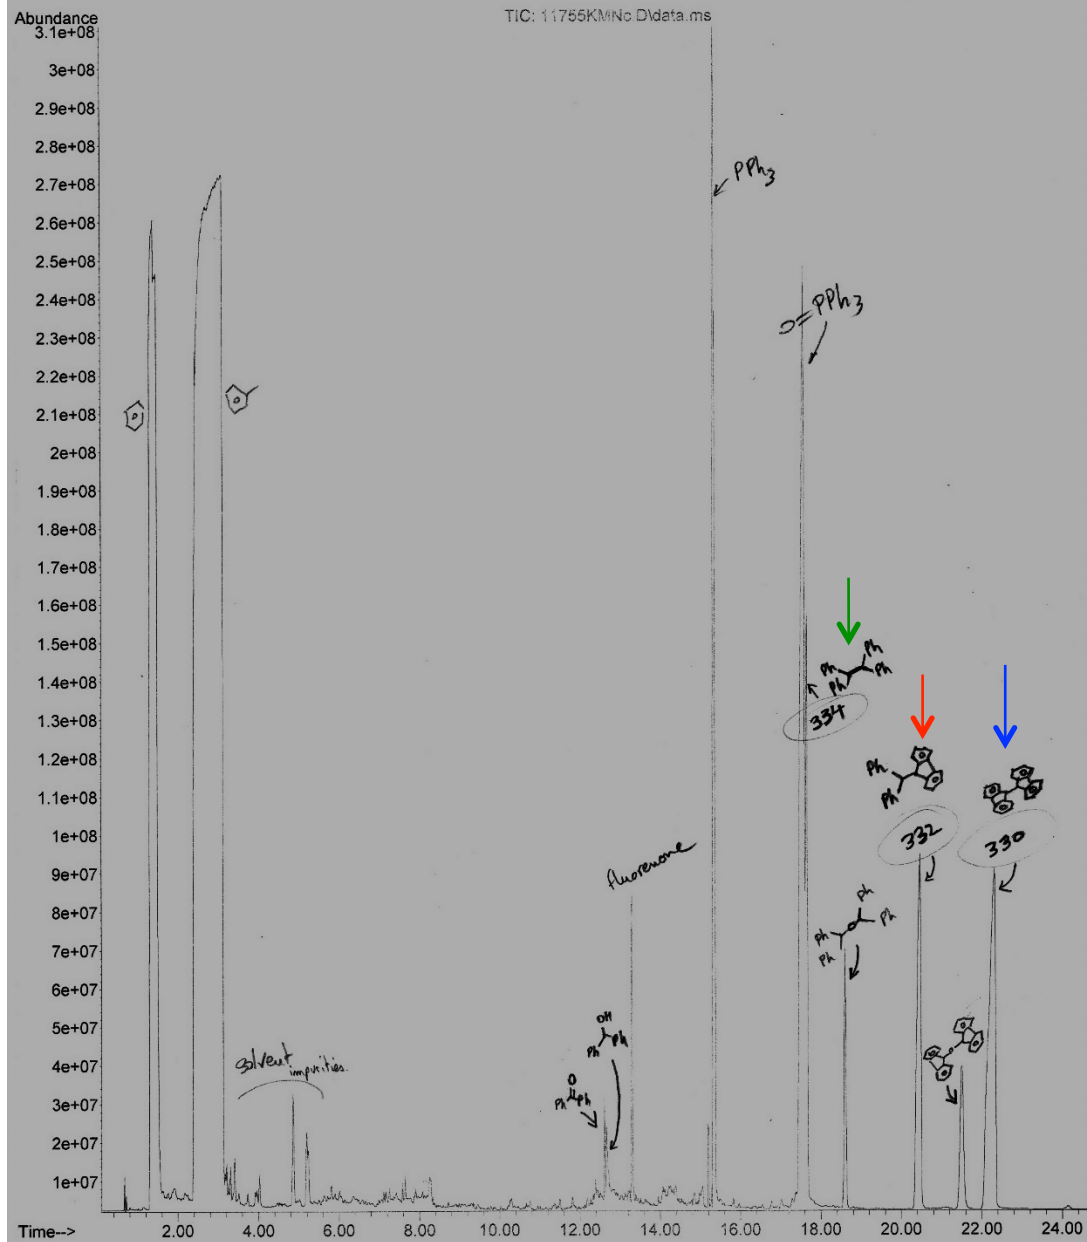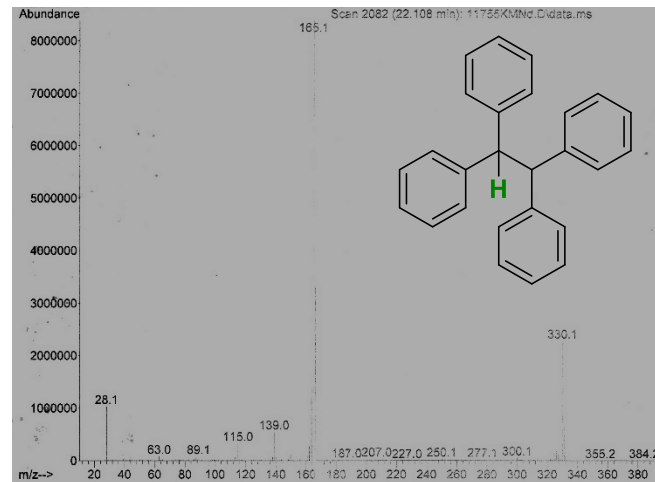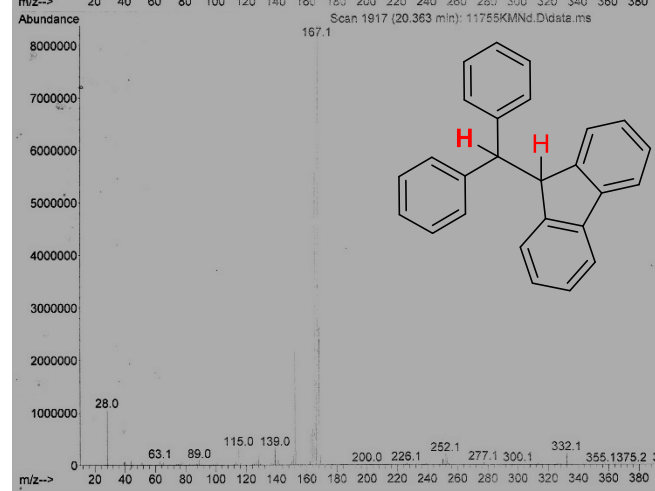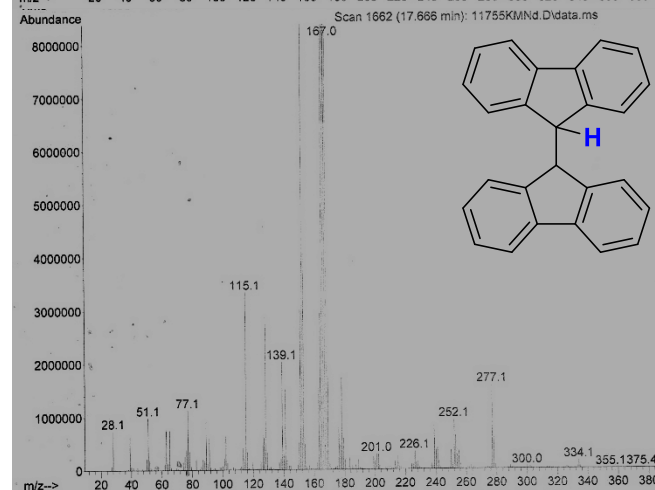

SpinWorks 4: STANDARD PROTON PARAMETERS;

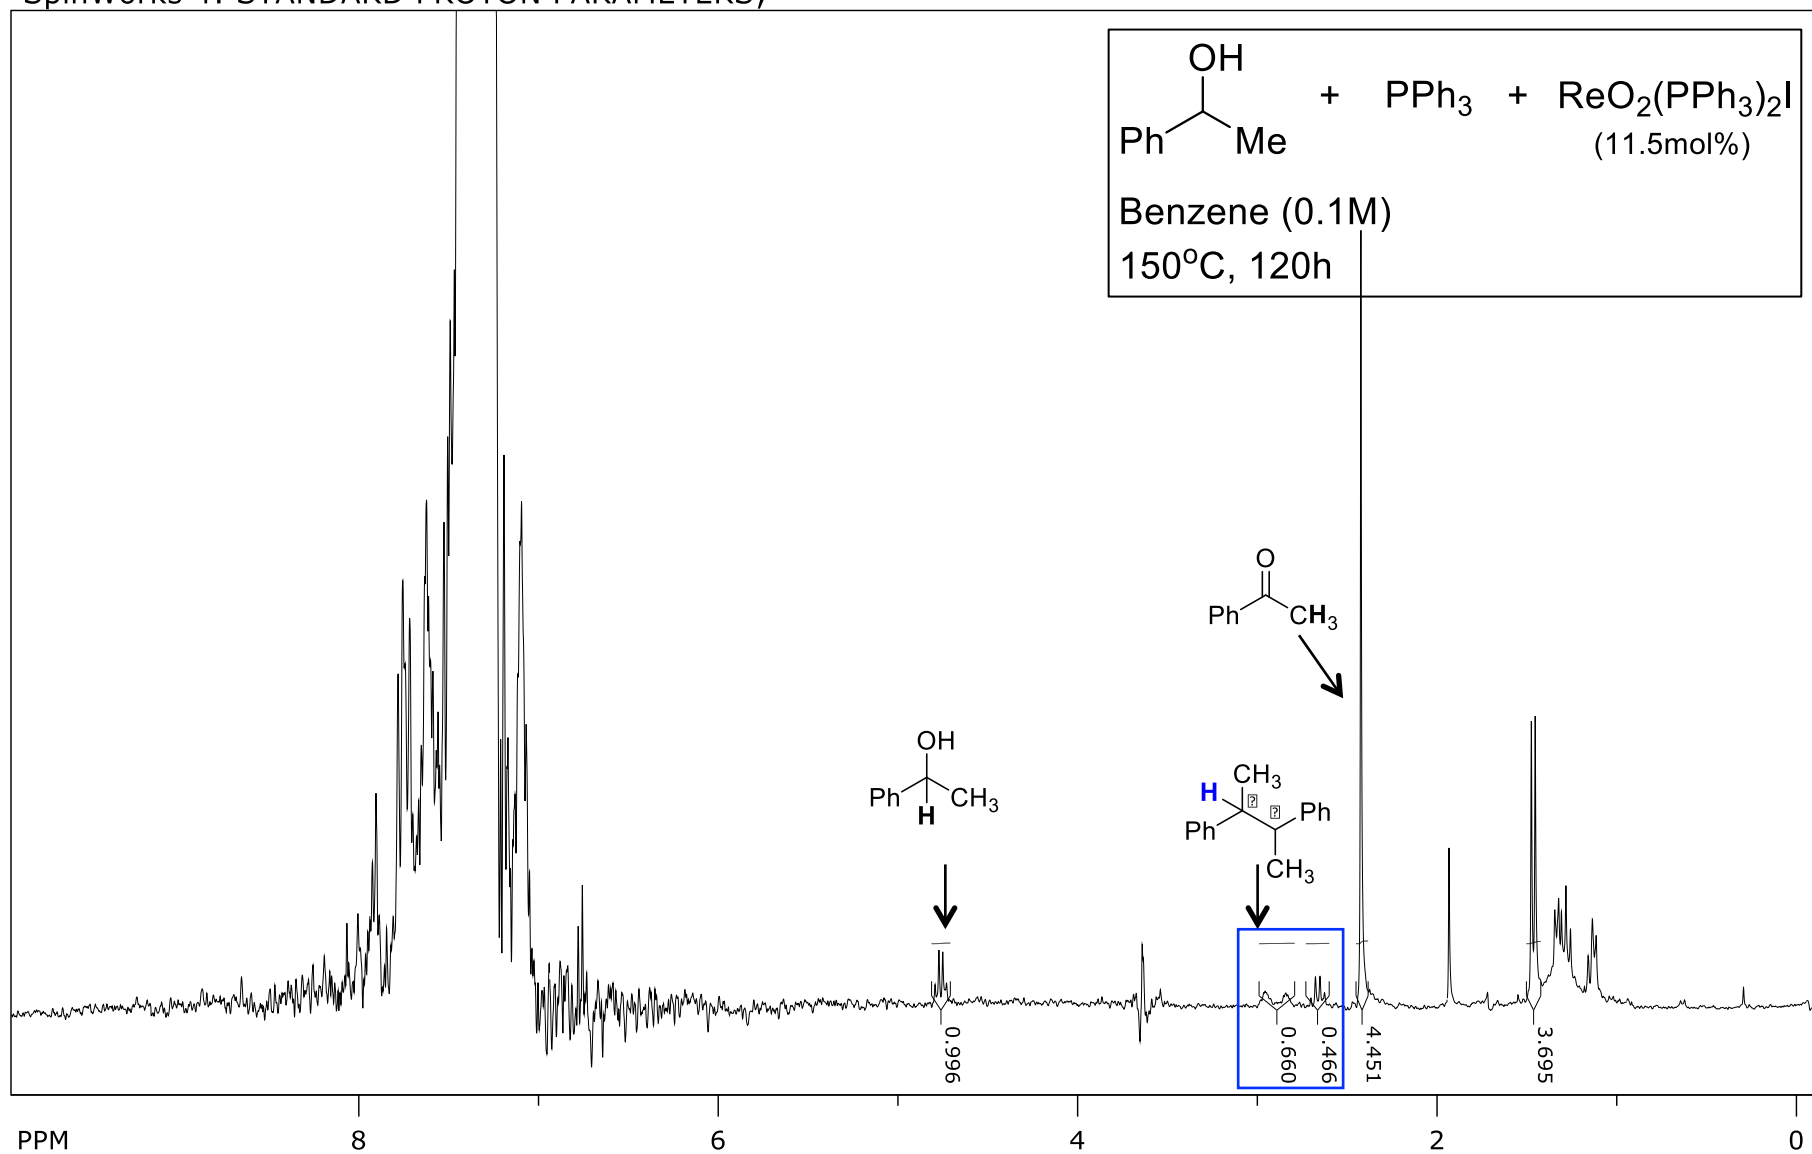

file: ...ments\Research\NMR\GK20\_1H.fid\fid\_block# 1 expt: "s2pul"  
 transmitter freq.: 300.123563 MHz  
 time domain size: 16384 points  
 width: 4803.07 Hz = 16.0037 ppm = 0.293156 Hz/pt  
 number of scans: 32

freq. of 0 ppm: 300.121912 MHz  
 processed size: 16384 complex points  
 LB: 1.500 GF: 0.0000

File : D:\GCMS\HPCHEM\1\DATA\1754MNNB.D  
 Operator : Foster  
 Acquired : 28 Mar 2016 10:47 using AcqMethod COFFEE22  
 Instrument : GCMS  
 Sample Name: GK20  
 Misc Info :  
 Vial Number: 1

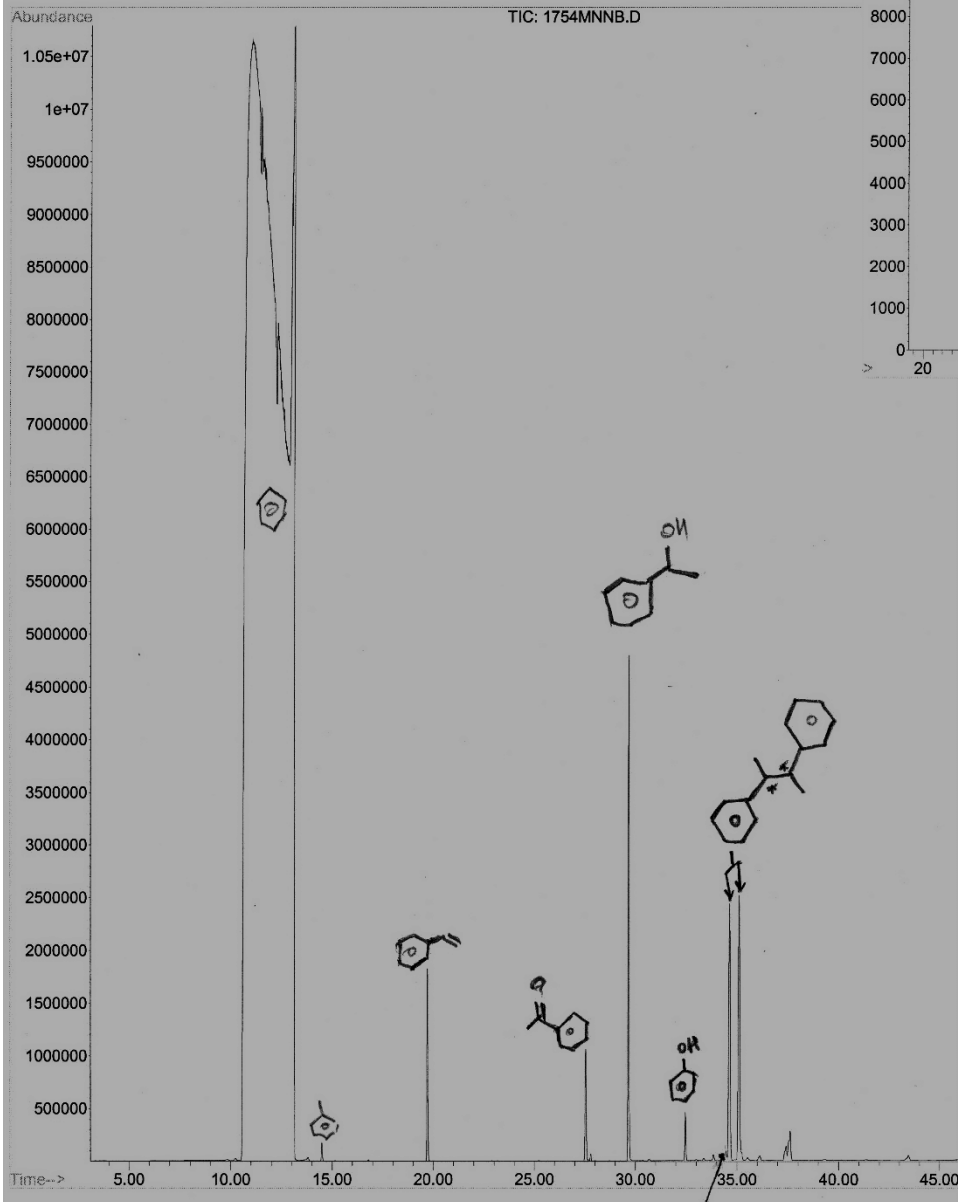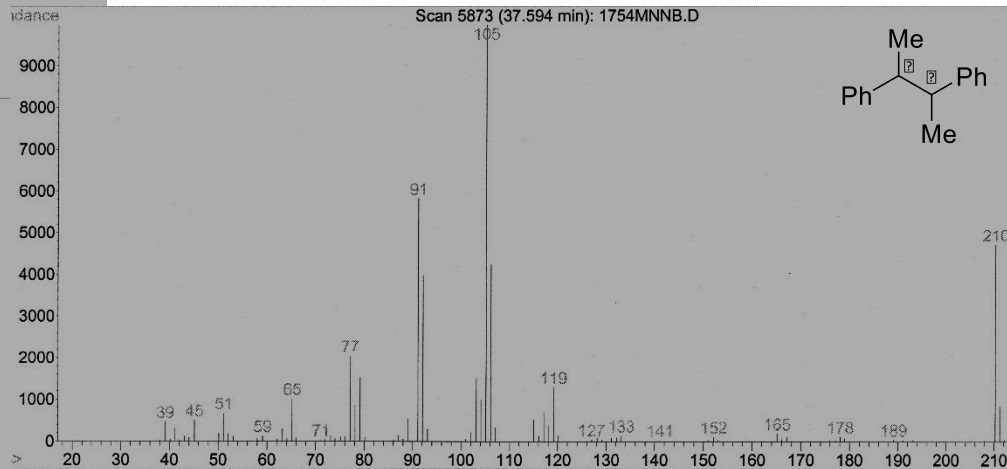

Same mass spectrum for 35.097min and 37.594min GC peaks

SpinWorks 4: GK41;

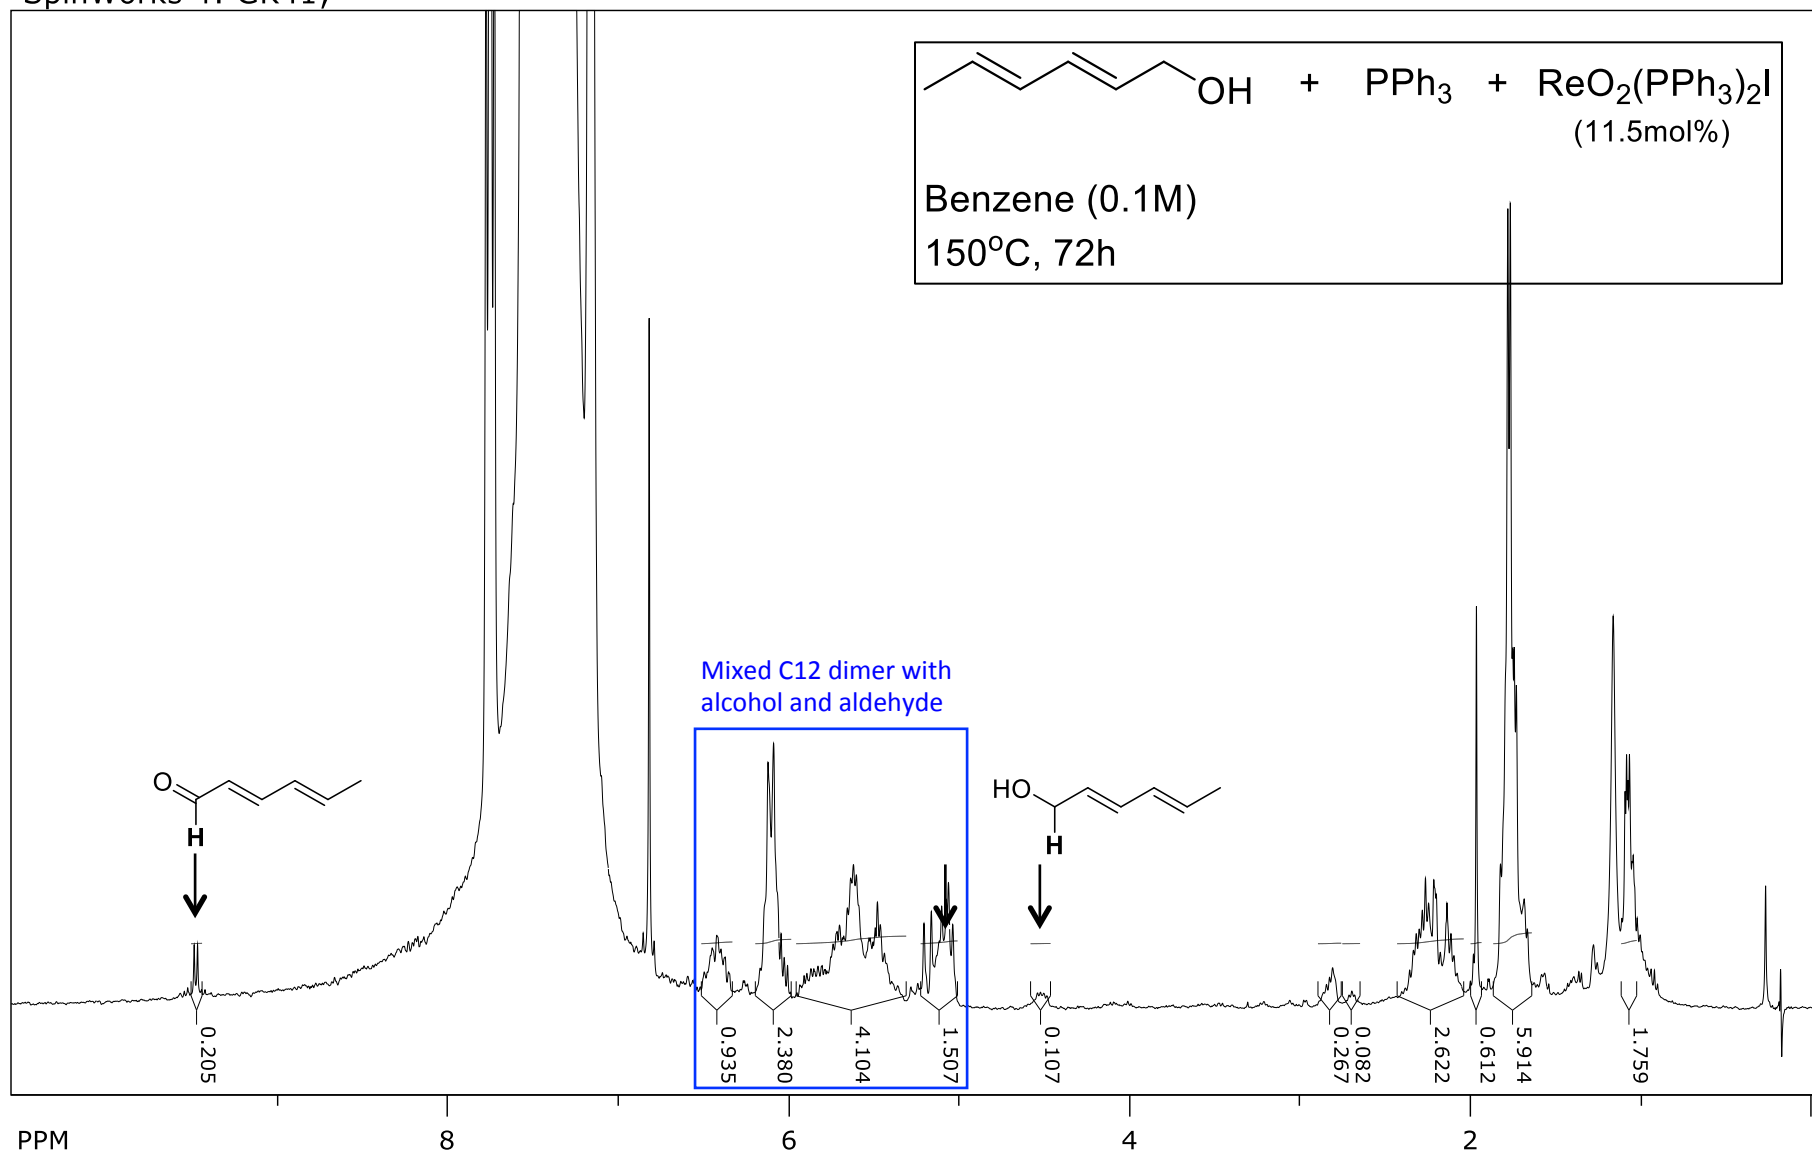

file: ...\_24Feb16\_01\GK41\_PROTON\_01.fid\fid\_block# 1 expt: "s2pul"  
transmitter freq.: 399.868346 MHz  
time domain size: 32768 points  
width: 6410.26 Hz = 16.0309 ppm = 0.195625 Hz/pt  
number of scans: 32

freq. of 0 ppm: 399.866121 MHz  
processed size: 32768 complex points  
LB: 1.500 GF: 0.0000

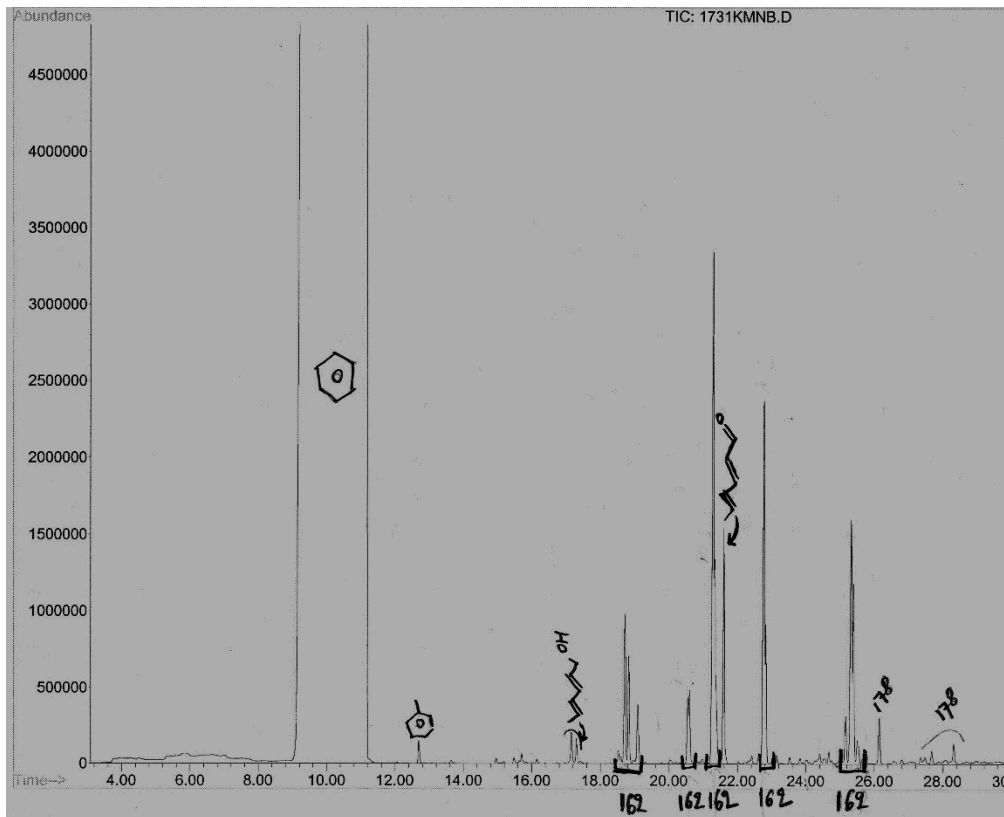

Same mass spectrum for all the 162 marked GC pics

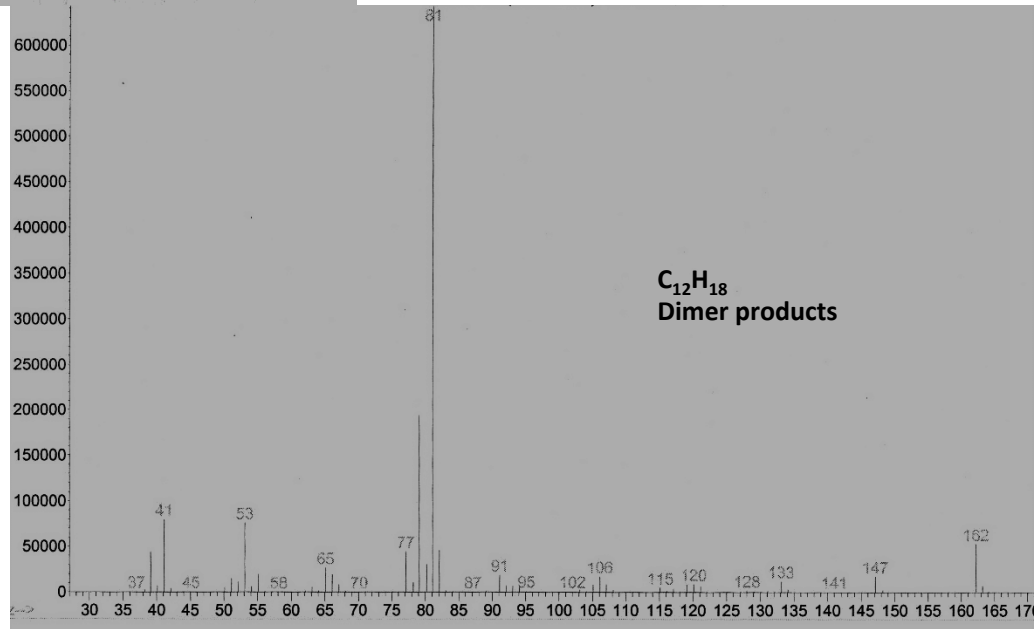

SpinWorks 4: STANDARD PROTON PARAMETERS;

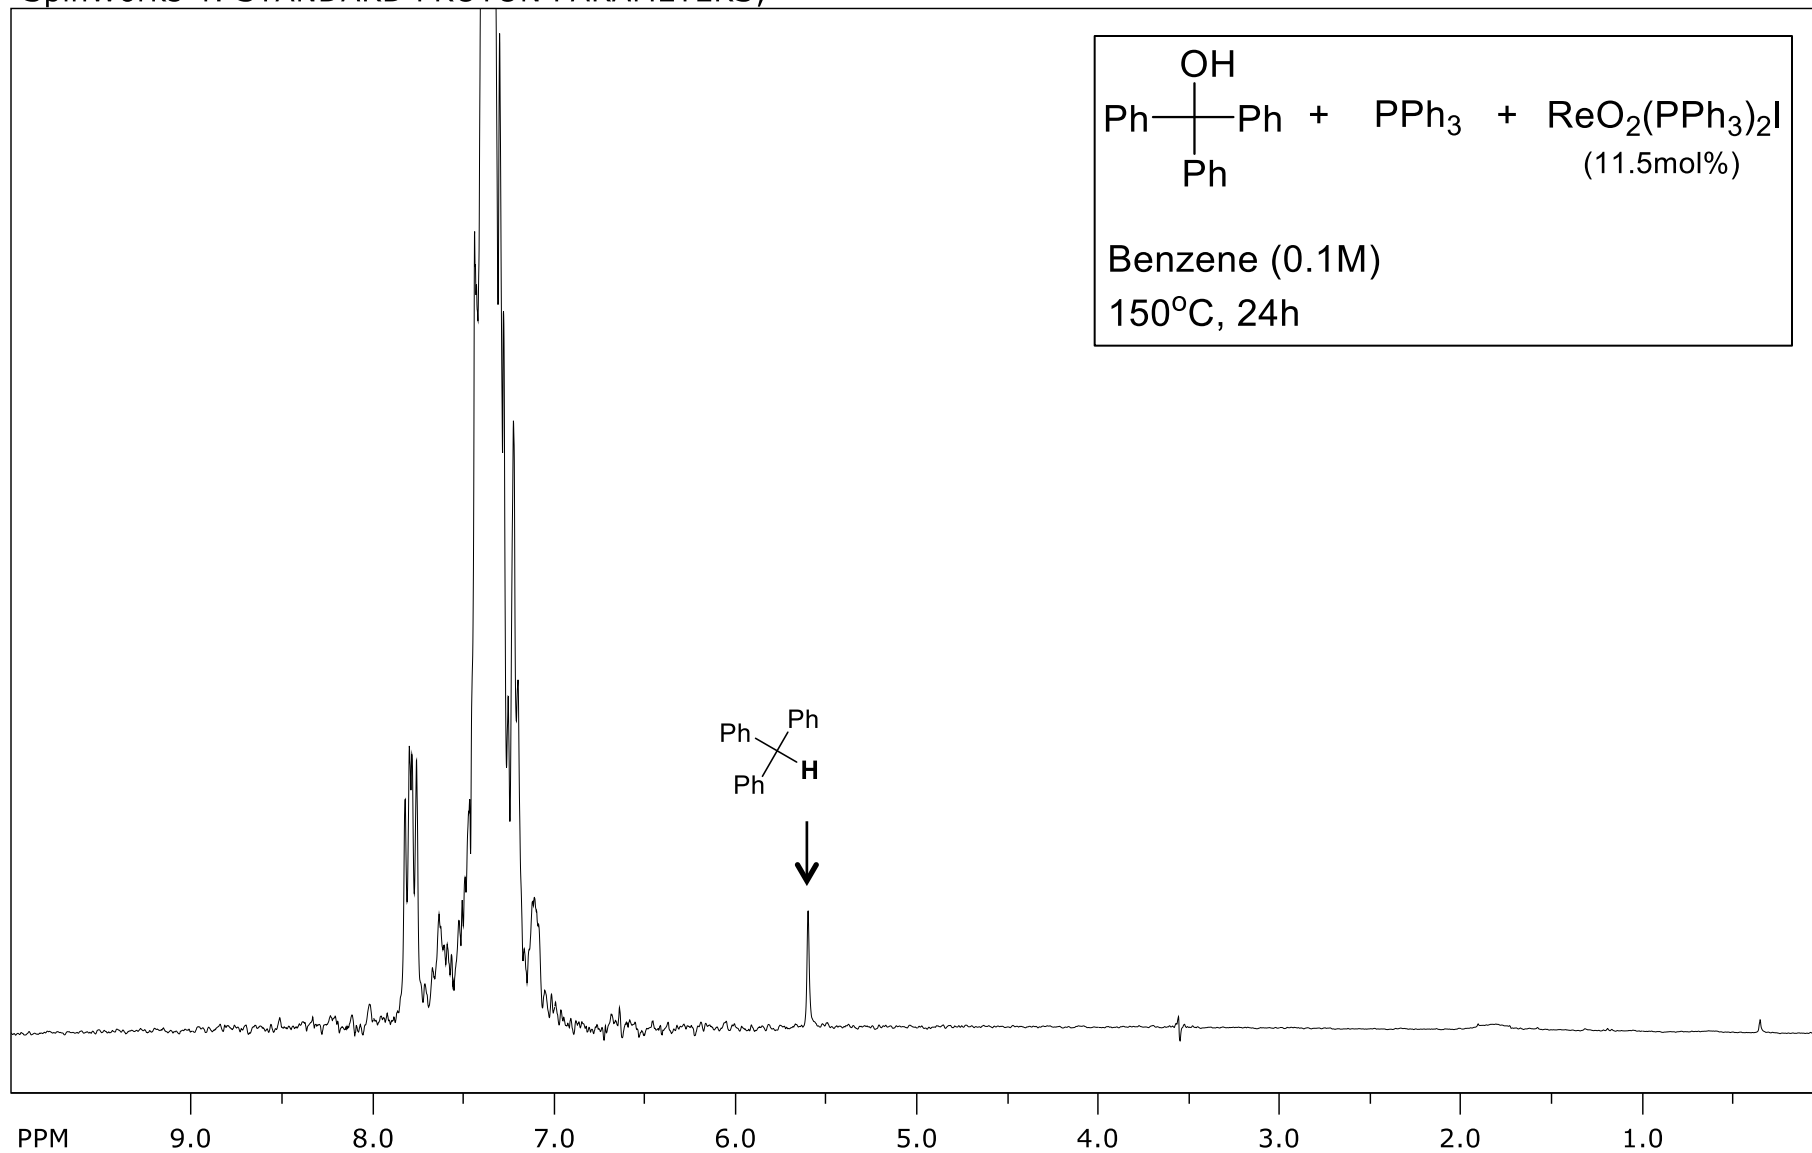

file: ...ments\Research\NMR\GK16\_1H.fid\fid block# 1 expt: "s2pul"  
transmitter freq.: 300.123563 MHz  
time domain size: 16384 points  
width: 4803.07 Hz = 16.0037 ppm = 0.293156 Hz/pt  
number of scans: 32

freq. of 0 ppm: 300.121924 MHz  
processed size: 16384 complex points  
LB: 1.500 GF: 0.0000



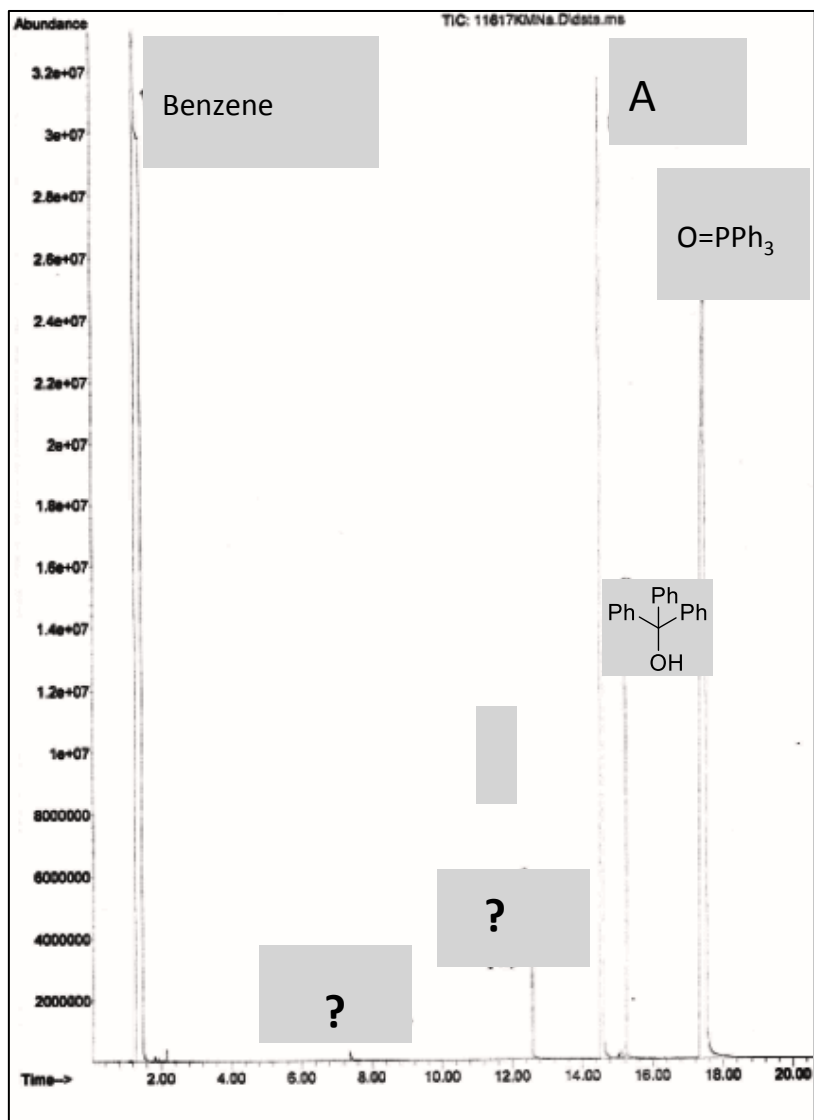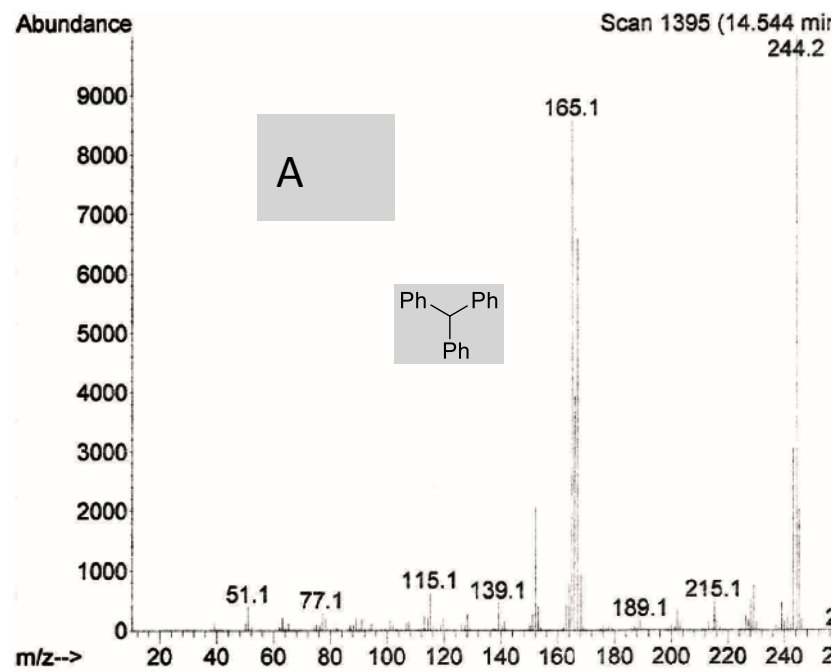

SpinWorks 4: STANDARD PROTON PARAMETERS;

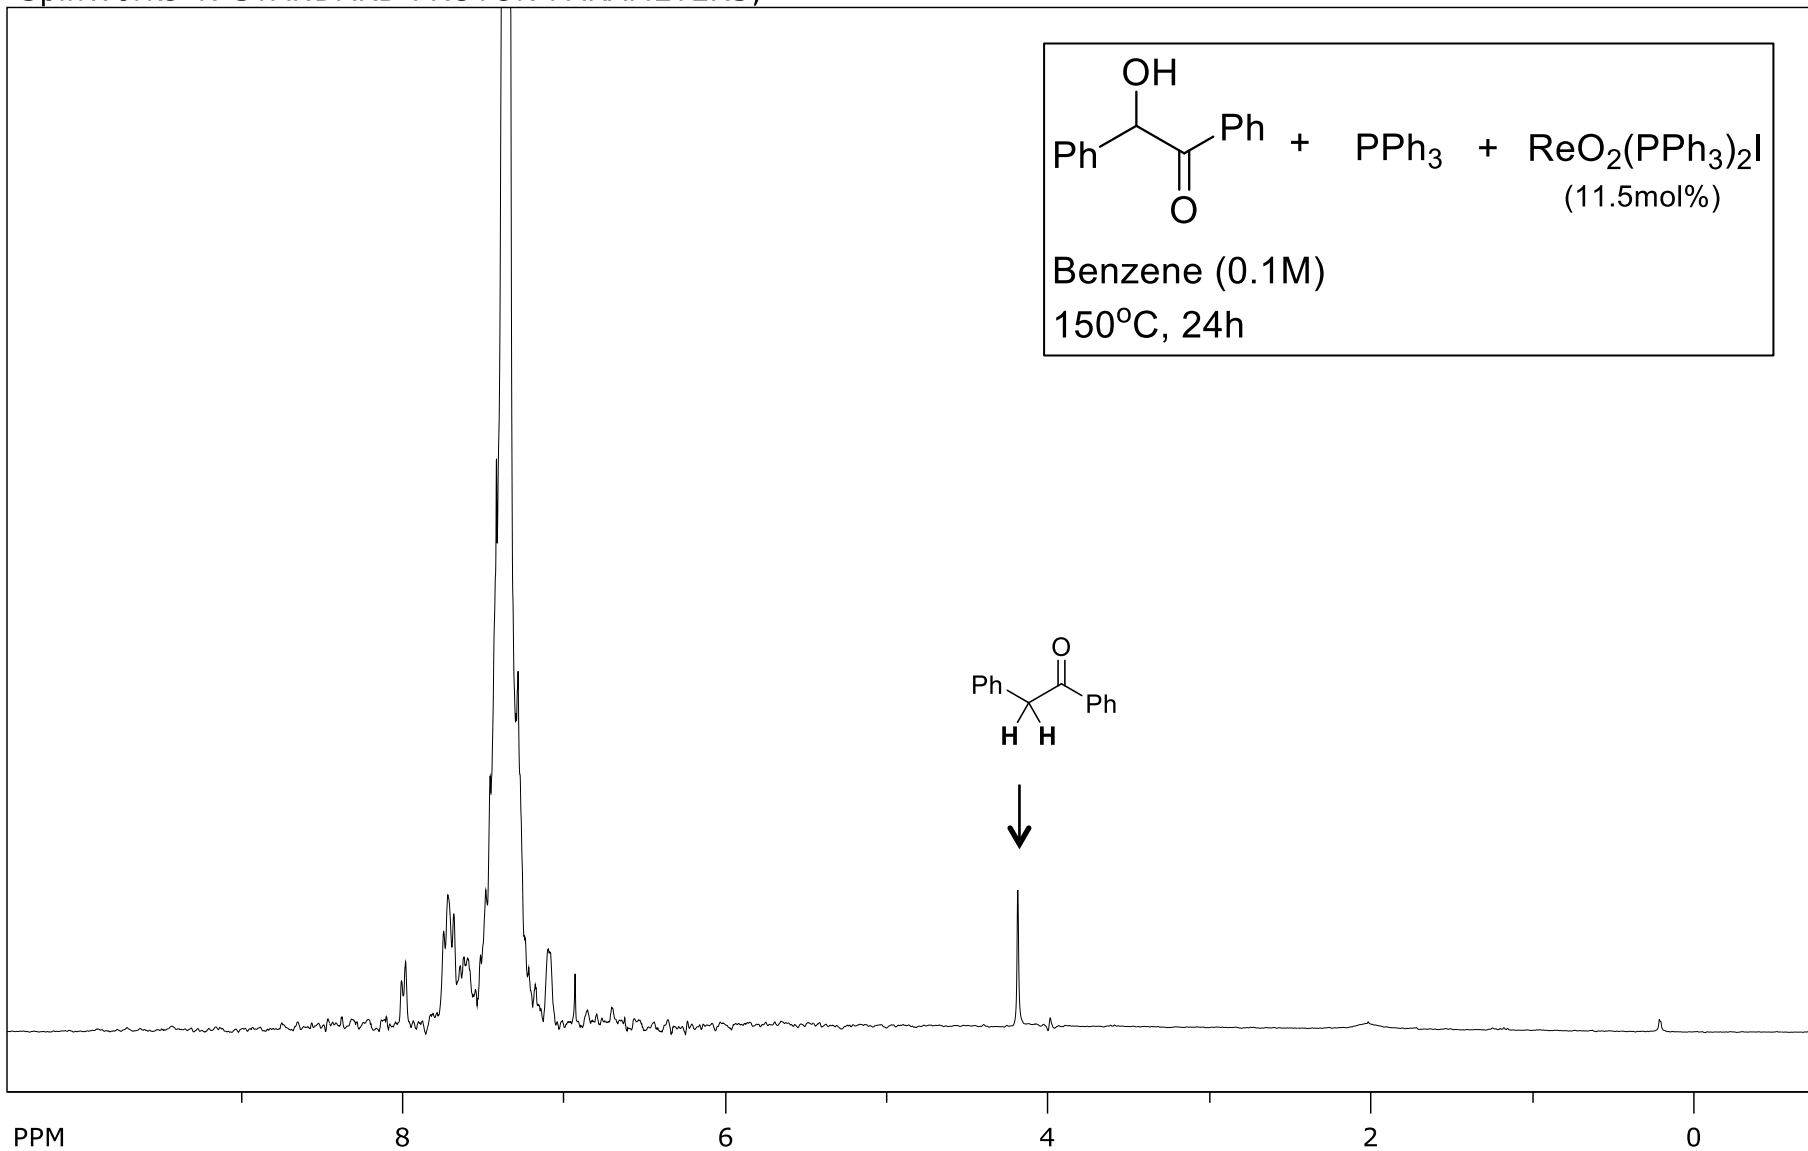

file: ...ments\Research\NMR\GK21\_1H.fid\fid block# 1 expt: "s2pul"  
transmitter freq.: 300.123563 MHz  
time domain size: 16384 points  
width: 4803.07 Hz = 16.0037 ppm = 0.293156 Hz/pt  
number of scans: 32

freq. of 0 ppm: 300.121860 MHz  
processed size: 16384 complex points  
LB: 1.500 GF: 0.0000

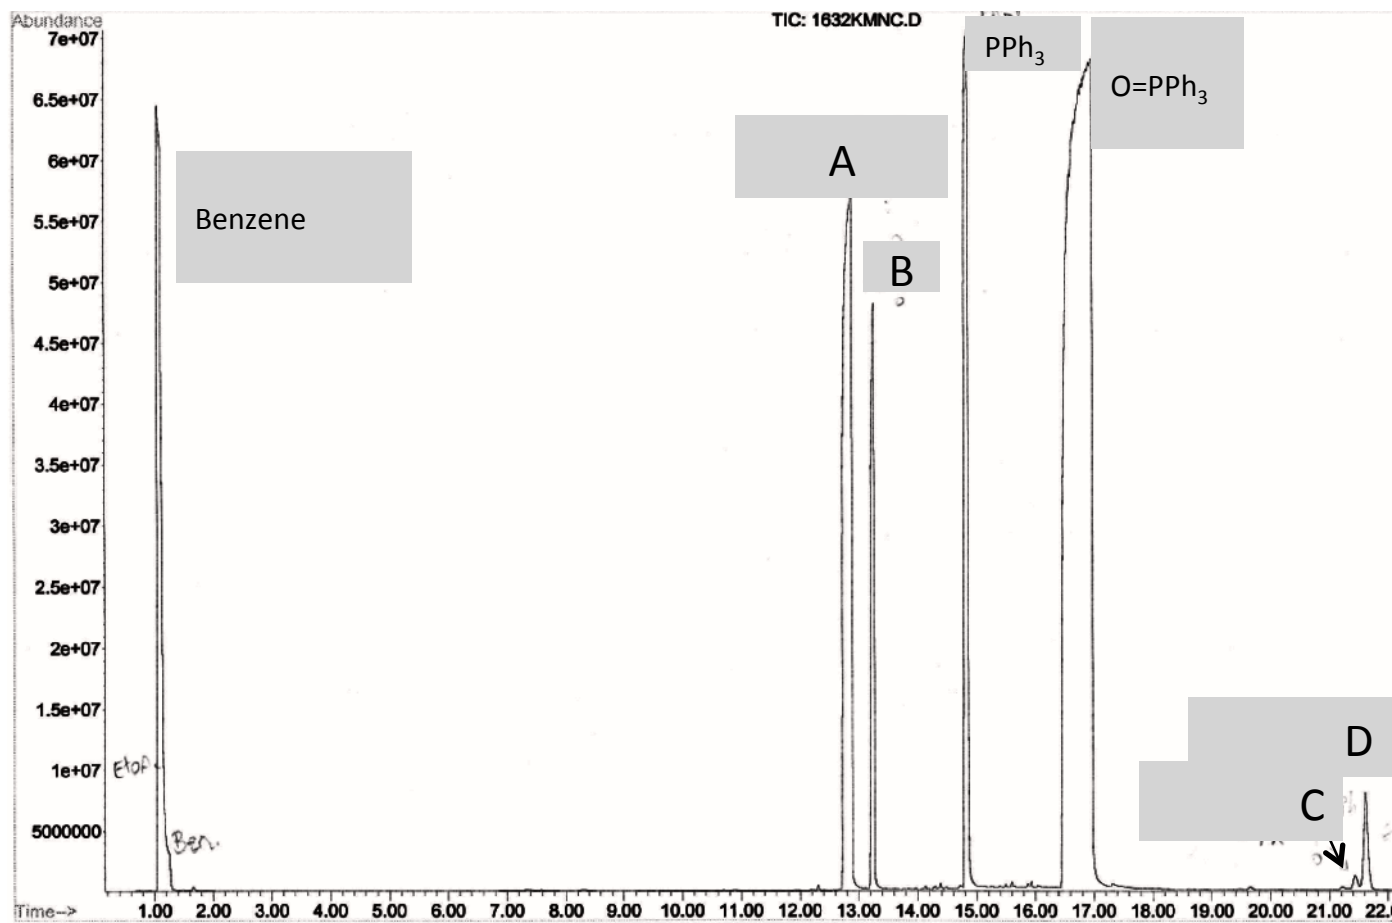

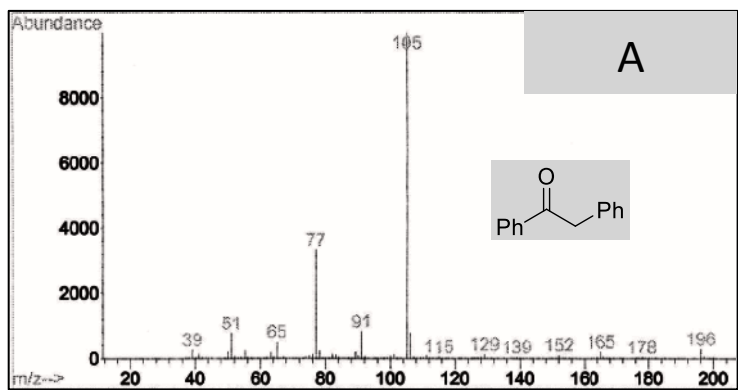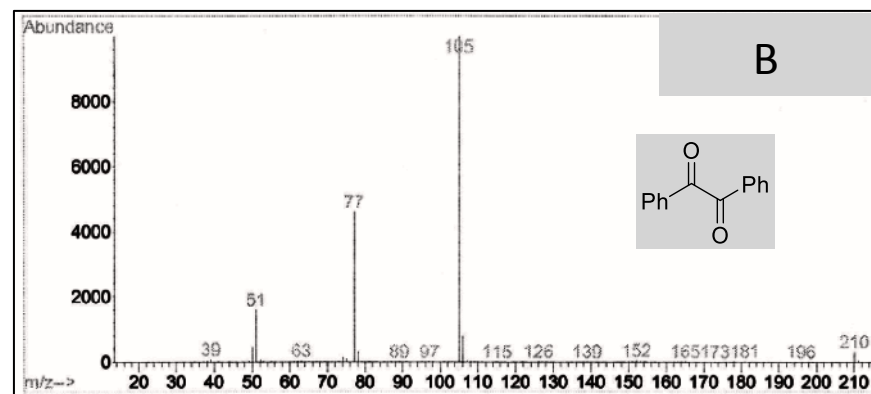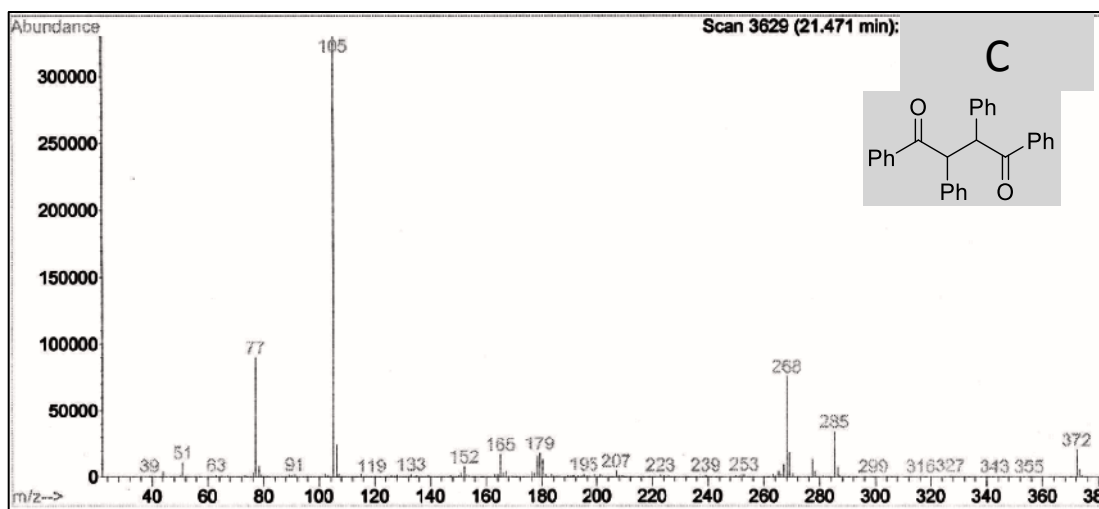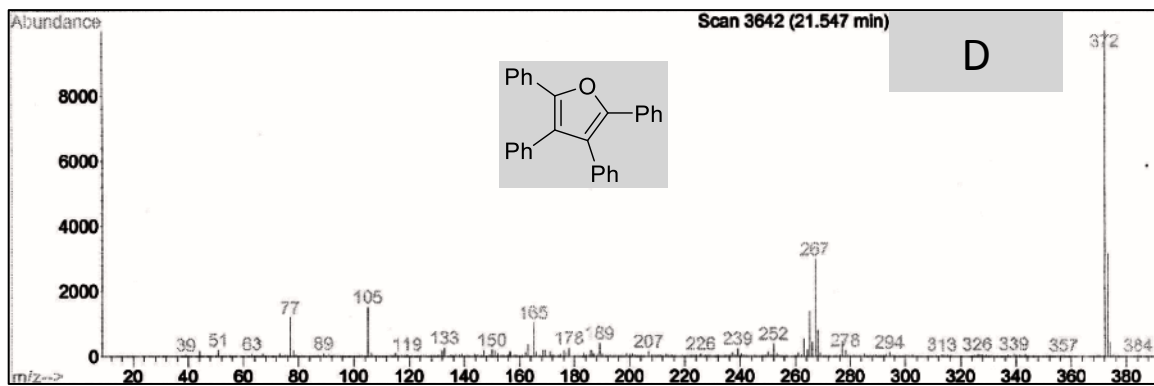

SpinWorks 4: GK11-2

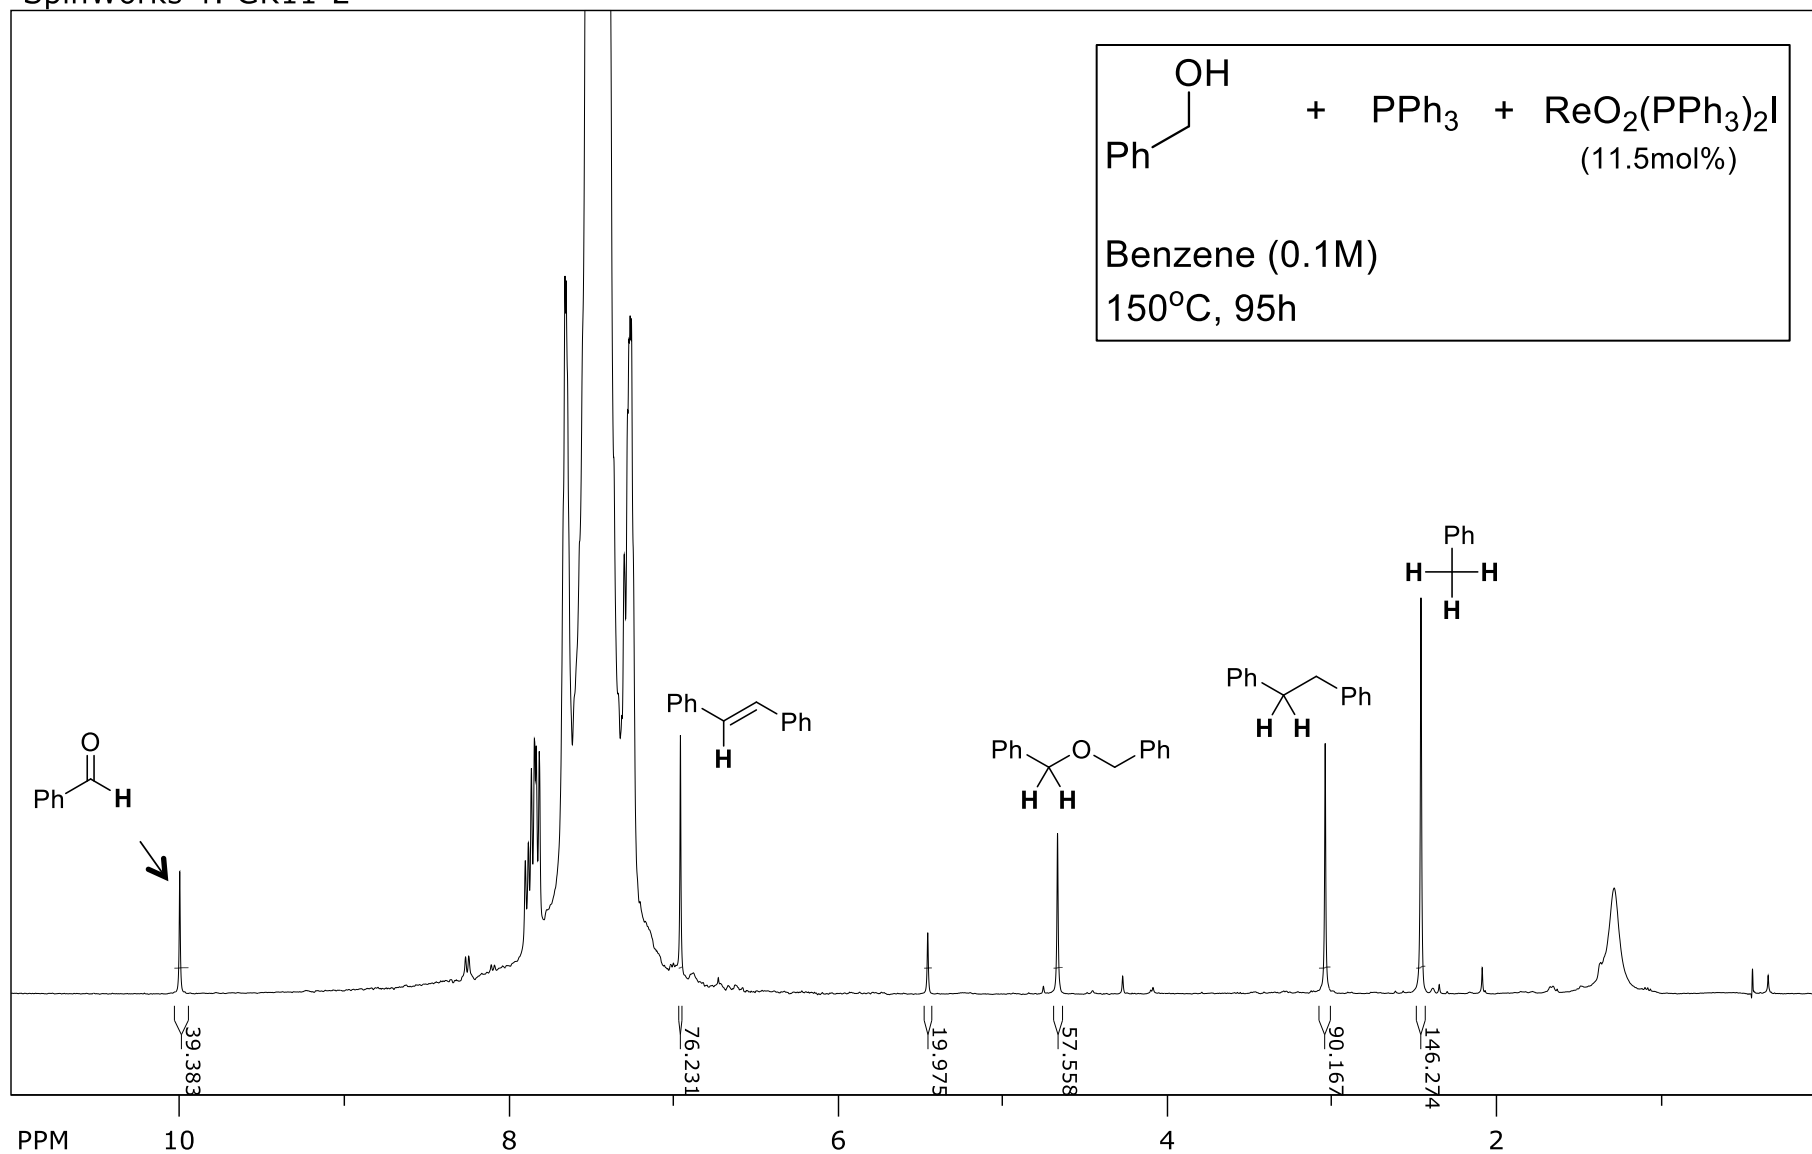

file: ...7Oct15\_01\GK11-2\_PROTON\_01.fid\fid block# 1 expt: "s2pul"  
 transmitter freq.: 399.868346 MHz  
 time domain size: 32768 points  
 width: 6410.26 Hz = 16.0309 ppm = 0.195626 Hz/pt  
 number of scans: 32

freq. of 0 ppm: 399.866064 MHz  
 processed size: 32768 complex points  
 LB: 1.500 GF: 0.0000

Data Name : C:\GCsolution\Data\Gabrielle\GK11-2.gcd  
 Method Name : C:\GCsolution\Mike method1.gcm

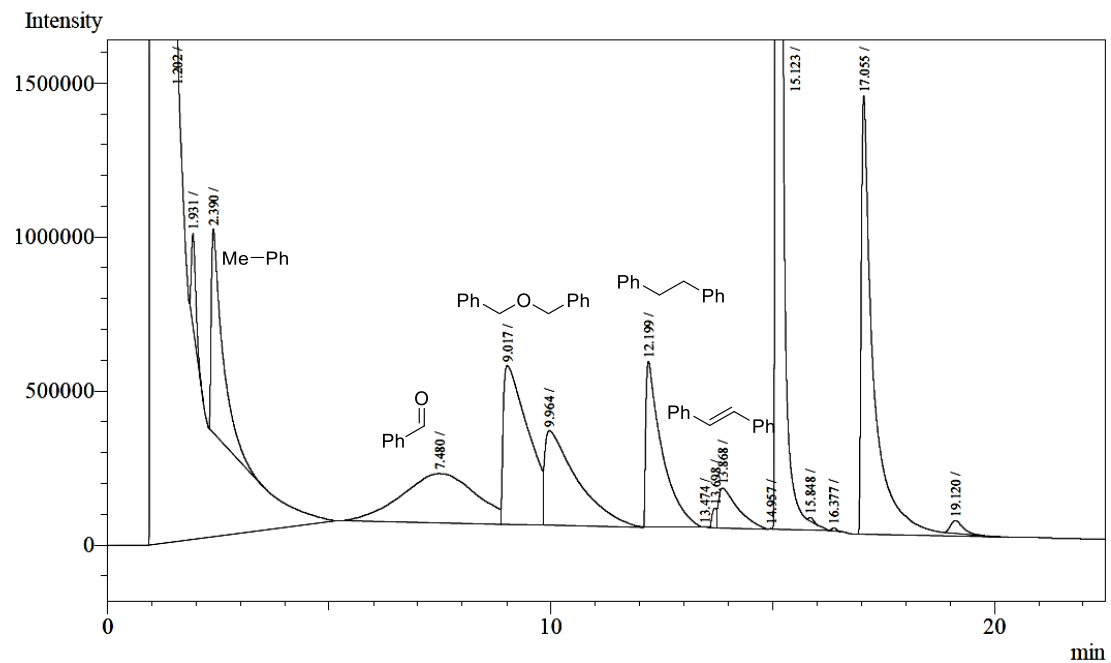

| Peak# | Ret.Time | Area        | Height    | Conc.  | Unit | Mark | ID# | Cmpd Name |
|-------|----------|-------------|-----------|--------|------|------|-----|-----------|
| 1     | 1.202    | 21531647921 | 318973622 | 99.027 |      | S    |     |           |
| 2     | 1.931    | 2126166     | 306718    | 0.010  |      | T    |     |           |
| 3     | 2.390    | 11777596    | 661125    | 0.054  |      | T    |     |           |
| 4     | 7.480    | 18292224    | 159180    | 0.084  |      |      |     |           |
| 5     | 9.017    | 19844079    | 514613    | 0.091  |      | V    |     |           |
| 6     | 9.964    | 15629716    | 306863    | 0.072  |      | V    |     |           |
| 7     | 12.199   | 13740611    | 538516    | 0.063  |      | S    |     |           |
| 8     | 13.474   | 10374       | 1726      | 0.000  |      | T    |     |           |
| 9     | 13.698   | 418127      | 62539     | 0.002  |      |      |     |           |
| 10    | 13.868   | 3901623     | 129416    | 0.018  |      | V    |     |           |
| 11    | 14.957   | 9544        | 2890      | 0.000  |      |      |     |           |
| 12    | 15.123   | 97277991    | 14457729  | 0.447  |      | SV   |     |           |
| 13    | 15.848   | 90164       | 11398     | 0.000  |      | T    |     |           |
| 14    | 16.377   | 74124       | 10134     | 0.000  |      |      |     |           |
| 15    | 17.055   | 27447199    | 1422535   | 0.126  |      | S    |     |           |
| 16    | 19.120   | 823592      | 41747     | 0.004  |      | T    |     |           |
| Total |          | 21743111051 | 337600751 |        |      |      |     |           |

SpinWorks 4: GK27yield;

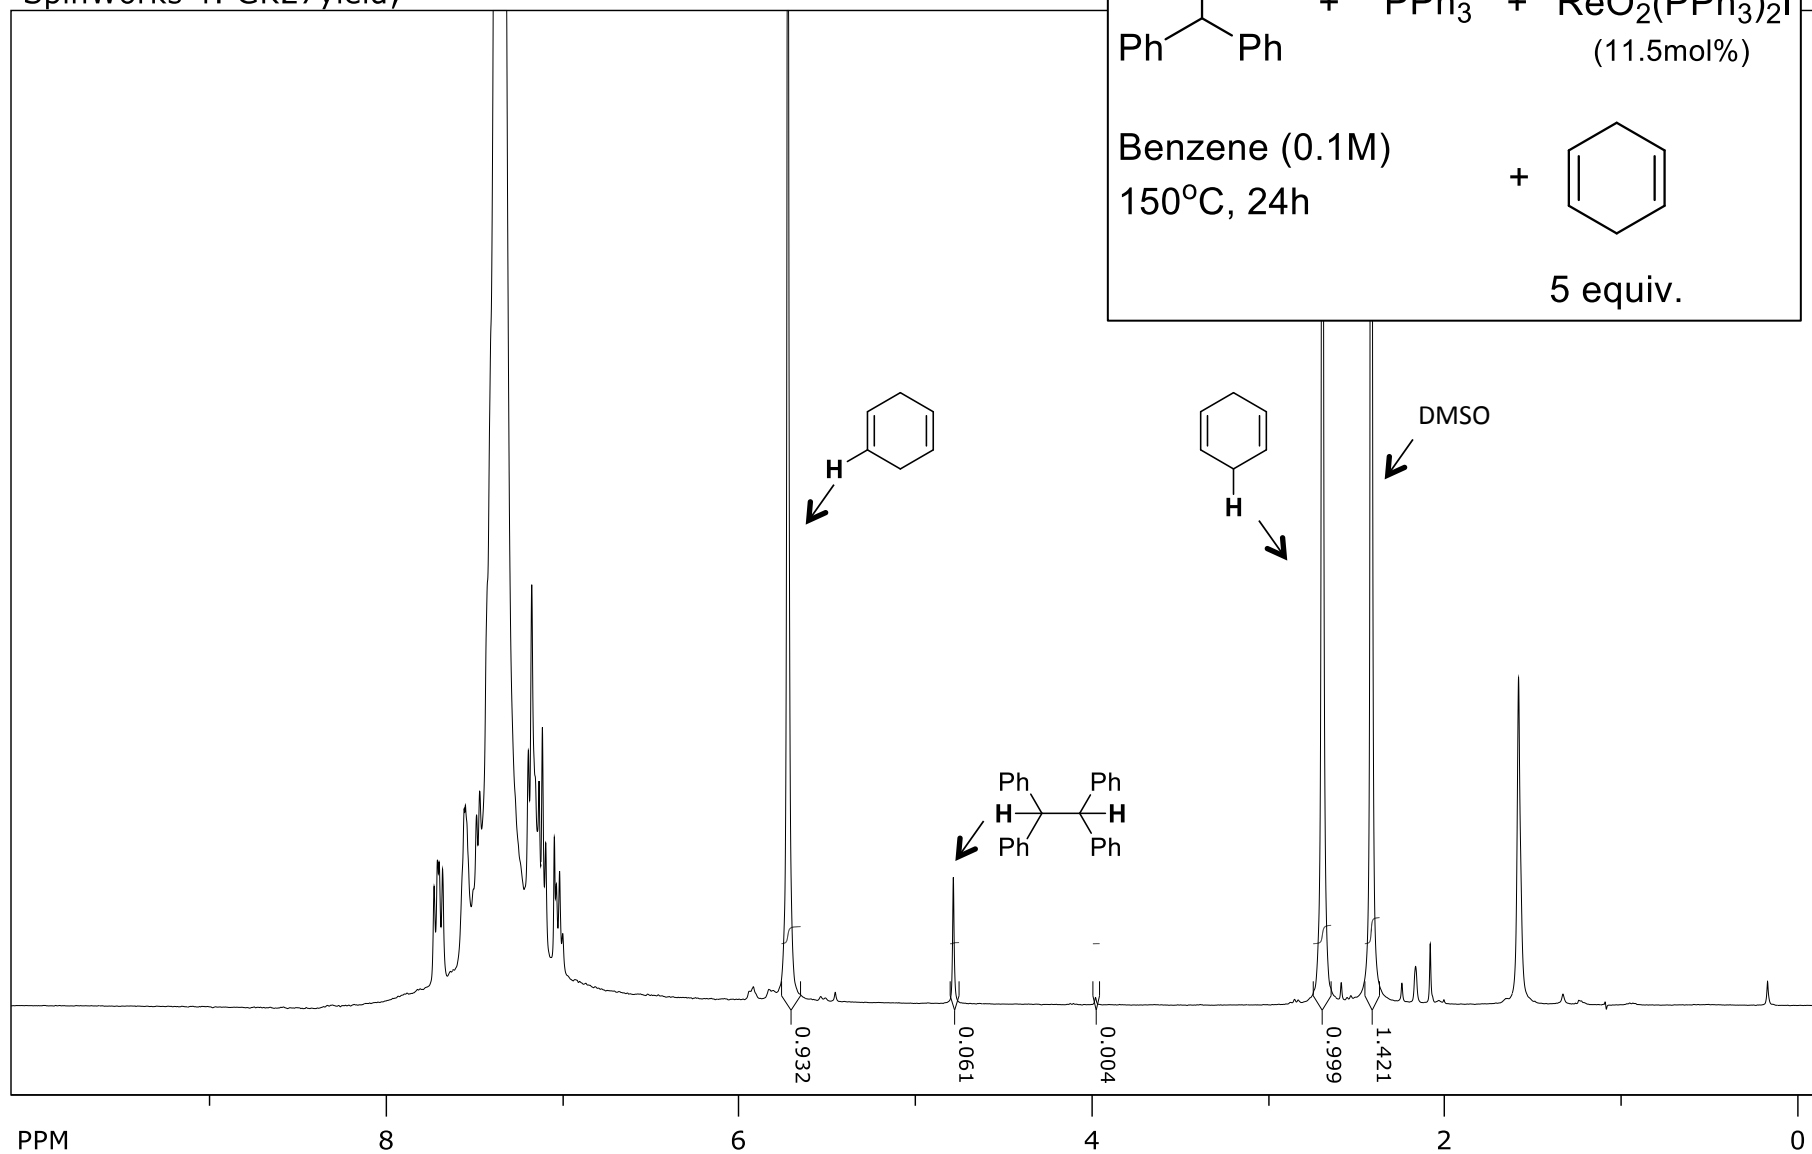

file: ...g15\_01\GK27yield\_PROTON\_01.fid\fid block# 1 expt: "s2pul"  
transmitter freq.: 399.868346 MHz  
time domain size: 32768 points  
width: 6410.26 Hz = 16.0309 ppm = 0.195625 Hz/pt  
number of scans: 8

freq. of 0 ppm: 399.866030 MHz  
processed size: 32768 complex points  
LB: 1.500 GF: 0.0000

SpinWorks 4: GK42;

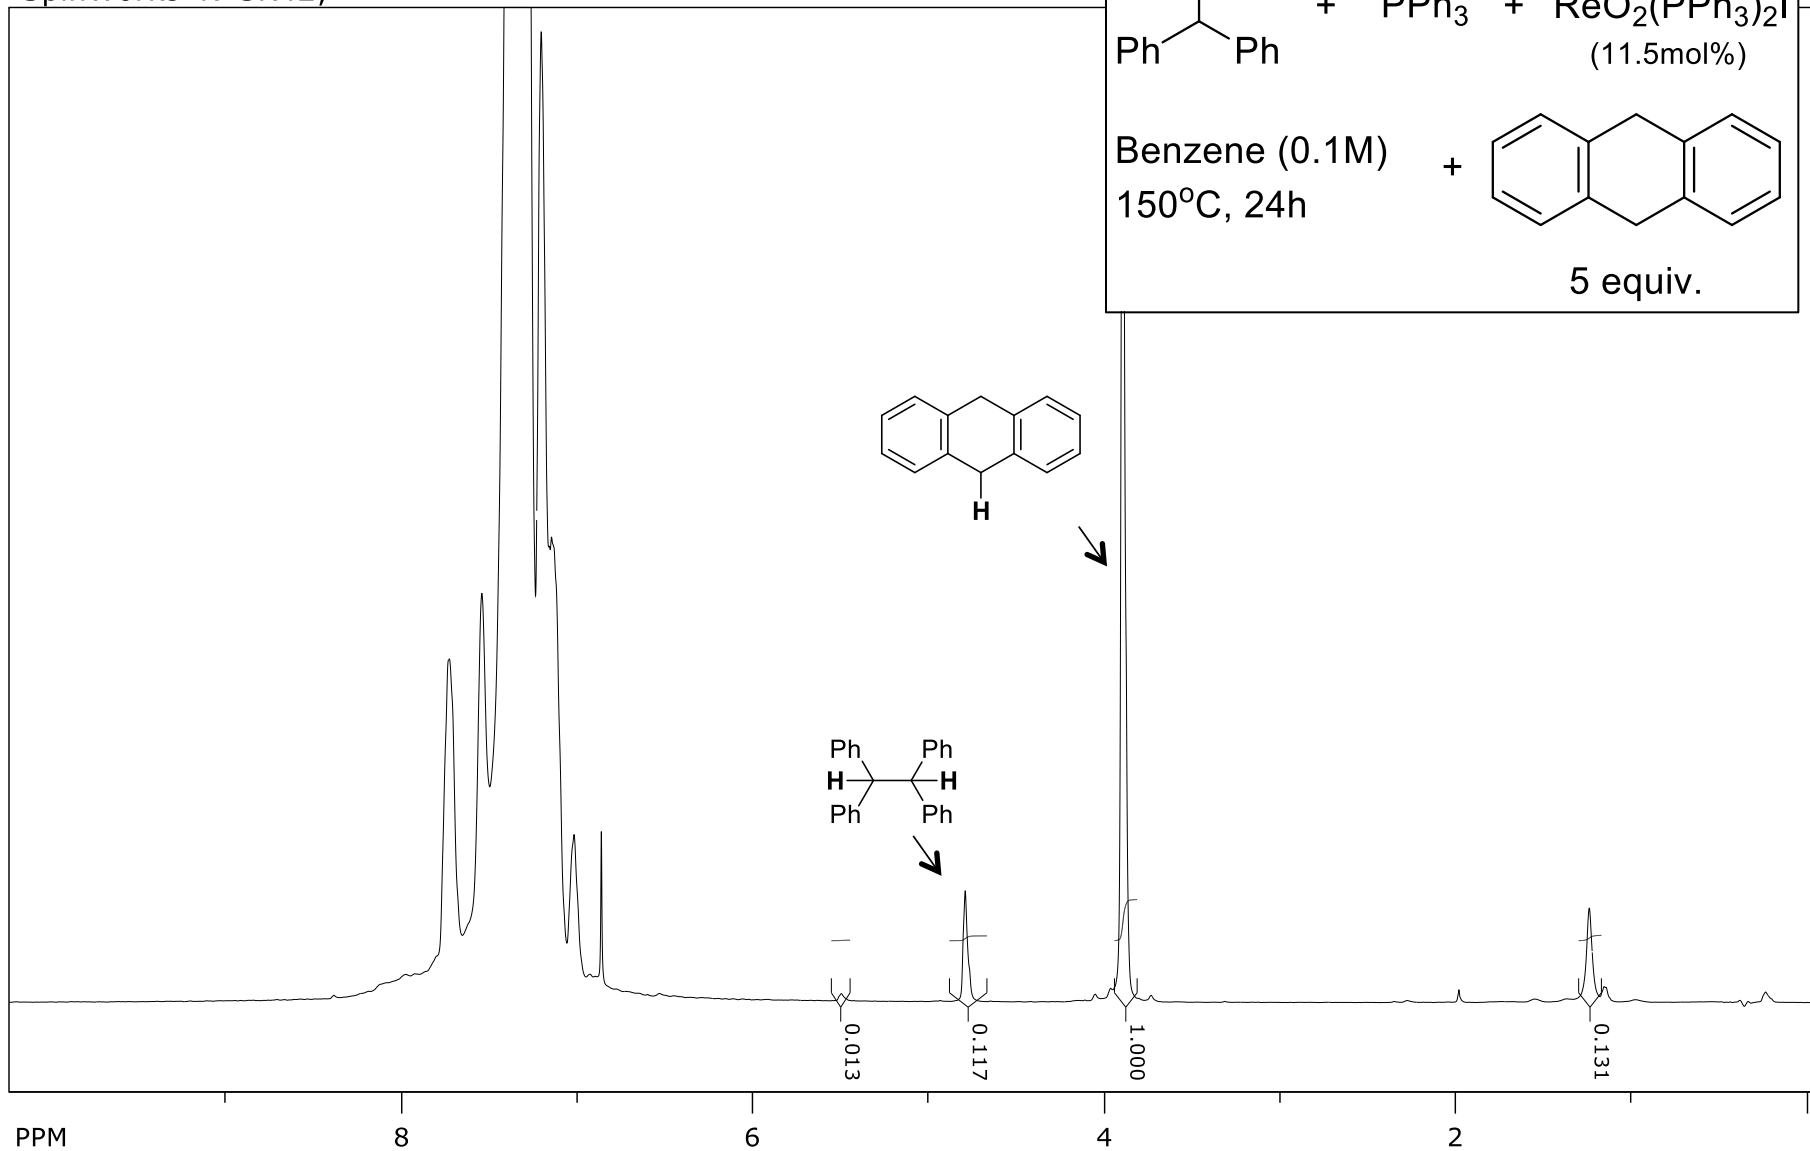

file: ...\_26Feb16\_01\GK42\_PROTON\_01.fid\fid\_block# 1 expt: "s2pul"  
transmitter freq.: 399.868346 MHz  
time domain size: 32768 points  
width: 6410.26 Hz = 16.0309 ppm = 0.195625 Hz/pt  
number of scans: 32

freq. of 0 ppm: 399.866104 MHz  
processed size: 32768 complex points  
LB: 1.500 GF: 0.0000



SpinWorks 4: GK43;

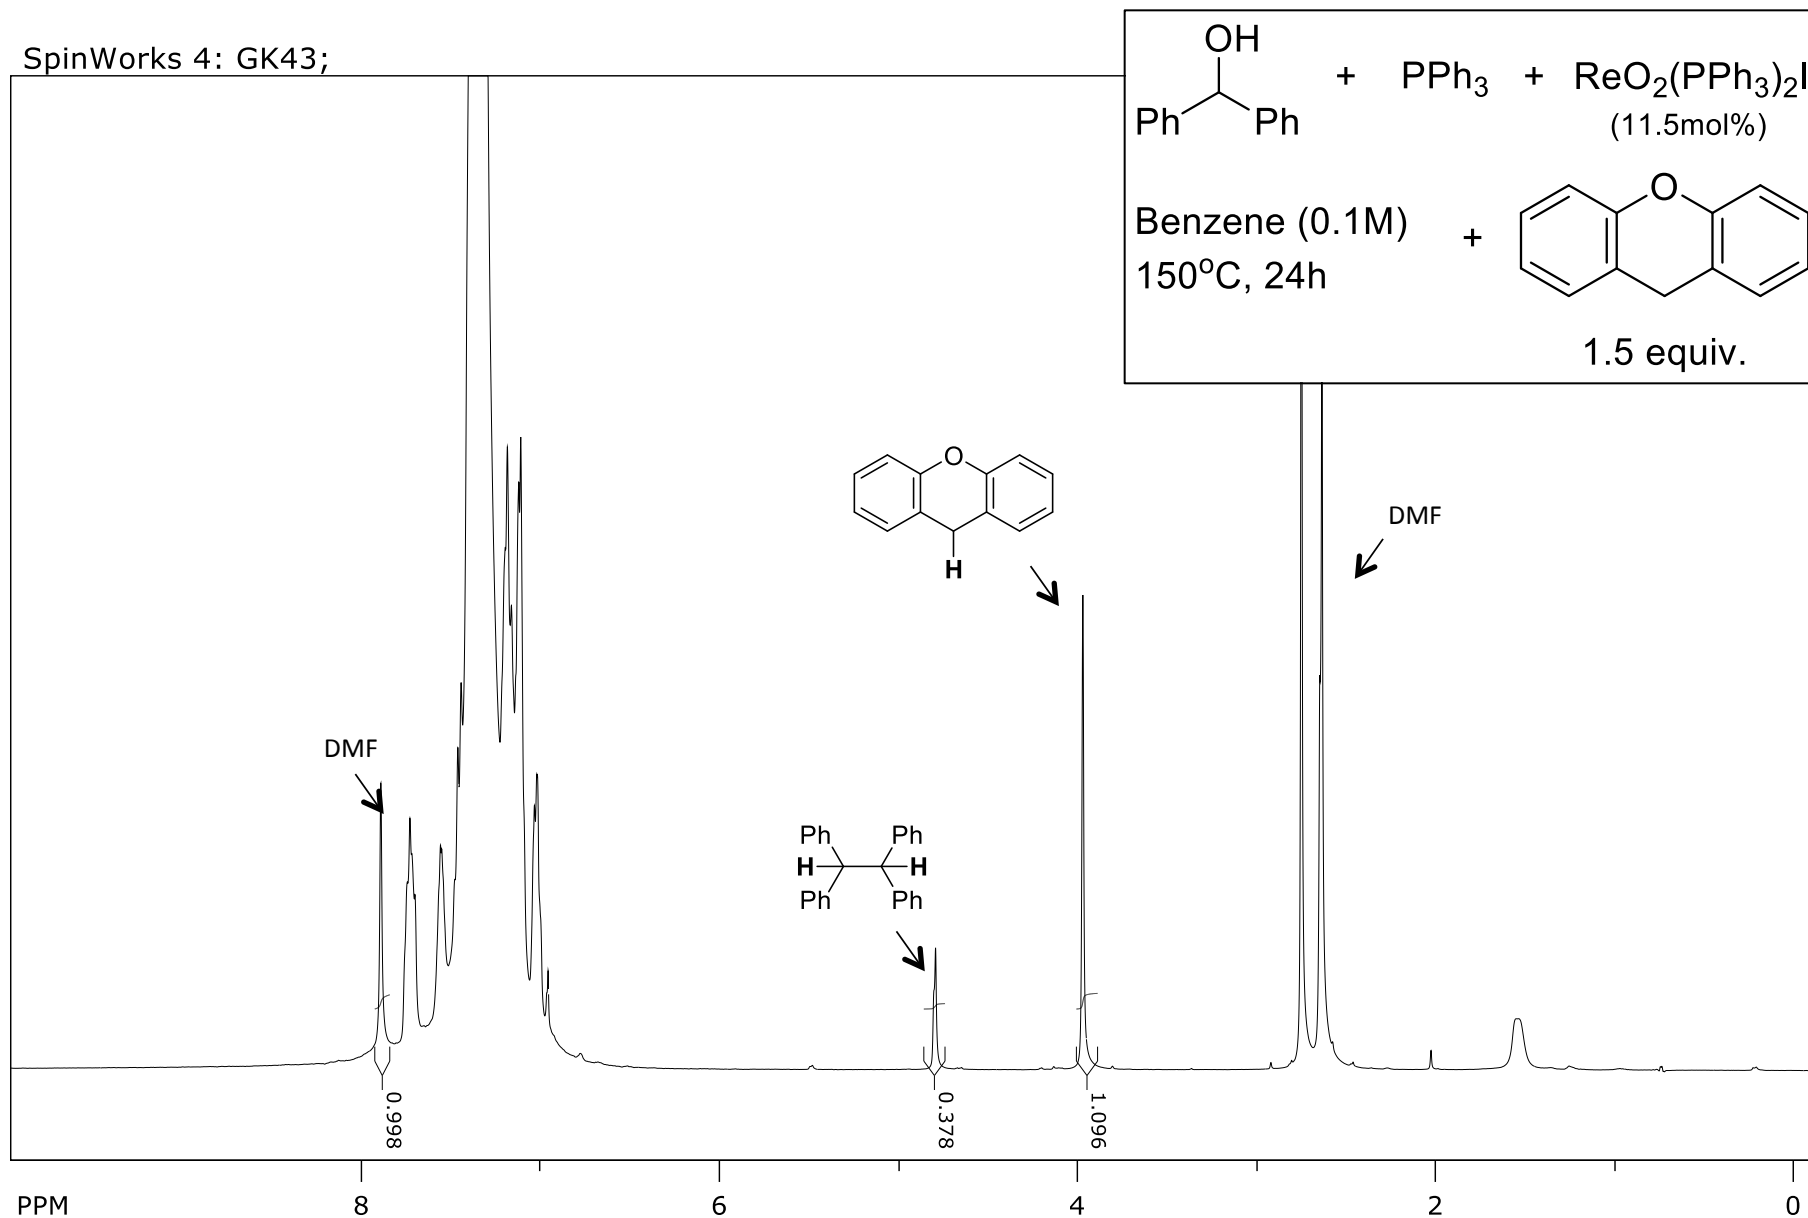

file: ...\_04Mar16\_01\GK43\_PROTON\_01.fid\fid block# 1 expt: "s2pul"  
transmitter freq.: 399.868346 MHz  
time domain size: 32768 points  
width: 6410.26 Hz = 16.0309 ppm = 0.195625 Hz/pt  
number of scans: 32

freq. of 0 ppm: 399.866064 MHz  
processed size: 32768 complex points  
LB: 1.500 GF: 0.0000

### *Computational Methods*

The B3LYP <sup>[a]</sup> method resident in Gaussian 09 <sup>[b]</sup> was used to determine the energy minimized structures of Figure 4; the 6-31-G(d) basis set was used for H, C, O atoms and LANL2DZ for Re.

[a] D. Becke, "Density-functional thermochemistry. III. The role of exact exchange," J. Chem. Phys. **98** (1993) 5648-52.

[b] Frisch, M. J.; Trucks, G. W.; Schlegel, H. B.; Scuseria, G. E.; Robb, M. A.; Cheeseman, J. R.; Scalmani, G.; Barone, V.; Mennucci, B.; Petersson, G. A.; Nakatsuji, H.; Caricato, M.; Li, X.; Hratchian, H. P.; Izmaylov, A. F.; Bloino, J.; Zheng, G.; Sonnenberg, J. L.; Hada, M.; Ehara, M.; Toyota, K.; Fukuda, R.; Hasegawa, J.; Ishida, M.; Nakajima, T.; Honda, Y.; Kitao, O.; Nakai, H.; Vreven, T.; Montgomery, Jr., J. A.; Peralta, J. E.; Ogliaro, F.; Bearpark, M.; Heyd, J. J.; Brothers, E.; Kudin, K. N.; Staroverov, V. N.; Kobayashi, R.; Normand, J.; Raghavachari, K.; Rendell, A.; Burant, J. C.; Iyengar, S. S.; Tomasi, J.; Cossi, M.; Rega, N.; Millam, J. M.; Klene, M.; Knox, J. E.; Cross, J. B.; Bakken, V.; Adamo, C.; Jaramillo, J.; Gomperts, R.; Stratmann, R. E.; Yazyev, O.; Austin, A. J.; Cammi, R.; Pomelli, C.; Ochterski, J. W.; Martin, R. L.; Morokuma, K.; Zakrzewski, V. G.; Voth, G. A.; Salvador, P.; Dannenberg, J. J.; Dapprich, S.; Daniels, A. D.; Farkas, Ö.; Foresman, J. B.; Ortiz, J. V.; Cioslowski, J.; Fox, D. J. Gaussian, Inc., Wallingford CT, 2009.

## XYZ Coordinates

### PhCH<sub>2</sub>OH

| Center Number | Atomic Number | Atomic Type | Coordinates (Angstroms) |           |           |
|---------------|---------------|-------------|-------------------------|-----------|-----------|
|               |               |             | X                       | Y         | Z         |
| 1             | 6             | 0           | 0.013089                | -1.062824 | 0.113005  |
| 2             | 6             | 0           | -0.438959               | 0.260943  | 0.081628  |
| 3             | 6             | 0           | 0.497744                | 1.295520  | -0.023954 |
| 4             | 6             | 0           | 1.863269                | 1.016186  | -0.085329 |
| 5             | 6             | 0           | 2.307960                | -0.306835 | -0.052972 |
| 6             | 6             | 0           | 1.378274                | -1.343955 | 0.042488  |
| 7             | 1             | 0           | -0.713387               | -1.865847 | 0.178870  |
| 8             | 1             | 0           | 0.156456                | 2.328378  | -0.062077 |
| 9             | 1             | 0           | 2.578130                | 1.830821  | -0.168478 |
| 10            | 1             | 0           | 3.370773                | -0.527557 | -0.107622 |
| 11            | 1             | 0           | 1.716366                | -2.377006 | 0.061562  |
| 12            | 6             | 0           | -1.911463               | 0.582383  | 0.205690  |
| 13            | 1             | 0           | -2.156626               | 0.761694  | 1.266922  |
| 14            | 1             | 0           | -2.128268               | 1.519017  | -0.333193 |
| 15            | 8             | 0           | -2.684251               | -0.497714 | -0.306502 |
| 16            | 1             | 0           | -3.608928               | -0.336287 | -0.067302 |

### MeReO<sub>2</sub>

| Center Number | Atomic Number | Atomic Type | Coordinates (Angstroms) |           |           |
|---------------|---------------|-------------|-------------------------|-----------|-----------|
|               |               |             | X                       | Y         | Z         |
| 1             | 75            | 0           | 0.059576                | -0.000022 | 0.070789  |
| 2             | 6             | 0           | -1.953937               | -0.000881 | -0.182084 |
| 3             | 1             | 0           | -2.212760               | -0.000830 | 0.911873  |
| 4             | 1             | 0           | -2.381700               | 0.899309  | -0.630898 |
| 5             | 1             | 0           | -2.381712               | -0.900863 | -0.631187 |
| 6             | 8             | 0           | 0.888433                | 1.444820  | -0.241615 |
| 7             | 8             | 0           | 0.890518                | -1.443653 | -0.241696 |

**PhCH<sub>2</sub>OH-ReO<sub>2</sub>Me**

| Center<br>Number | Atomic<br>Number | Atomic<br>Type | Coordinates (Angstroms) |           |           |
|------------------|------------------|----------------|-------------------------|-----------|-----------|
|                  |                  |                | X                       | Y         | Z         |
| 1                | 6                | 0              | 4.443043                | 1.386882  | 0.089428  |
| 2                | 6                | 0              | 3.188616                | 1.012449  | 0.567321  |
| 3                | 6                | 0              | 2.751008                | -0.316205 | 0.444252  |
| 4                | 6                | 0              | 3.588855                | -1.260175 | -0.167020 |
| 5                | 6                | 0              | 4.846138                | -0.885102 | -0.642679 |
| 6                | 6                | 0              | 5.273004                | 0.438092  | -0.515223 |
| 7                | 1                | 0              | 4.775524                | 2.415824  | 0.191614  |
| 8                | 1                | 0              | 2.543449                | 1.749138  | 1.040010  |
| 9                | 1                | 0              | 3.258012                | -2.291952 | -0.261590 |
| 10               | 1                | 0              | 5.490775                | -1.624435 | -1.109131 |
| 11               | 1                | 0              | 6.252195                | 0.730479  | -0.883844 |
| 12               | 6                | 0              | 1.384579                | -0.708677 | 0.917553  |
| 13               | 1                | 0              | 1.286996                | -1.787549 | 1.055261  |
| 14               | 1                | 0              | 1.089491                | -0.195396 | 1.830959  |
| 15               | 8                | 0              | 0.376933                | -0.303283 | -0.100342 |
| 16               | 75               | 0              | -1.715544               | 0.074875  | -0.174608 |
| 17               | 8                | 0              | -2.089245               | 1.745027  | -0.176979 |
| 18               | 8                | 0              | -2.688262               | -1.101609 | -0.945783 |
| 19               | 6                | 0              | -1.616699               | -0.538891 | 1.854187  |
| 20               | 1                | 0              | -2.619857               | -0.691111 | 2.262157  |
| 21               | 1                | 0              | -1.046383               | -1.468702 | 1.980311  |
| 22               | 1                | 0              | -1.124839               | 0.244691  | 2.445898  |
| 23               | 1                | 0              | 0.813756                | -0.187903 | -0.958157 |

**PhCH<sub>2</sub>O-ReMe(O)(OH)**

| Center<br>Number | Atomic<br>Number | Atomic<br>Type | Coordinates (Angstroms) |           |           |
|------------------|------------------|----------------|-------------------------|-----------|-----------|
|                  |                  |                | X                       | Y         | Z         |
| 1                | 6                | 0              | 3.755218                | 1.518825  | -0.011274 |
| 2                | 6                | 0              | 2.565596                | 0.899076  | 0.367813  |
| 3                | 6                | 0              | 2.475585                | -0.500762 | 0.395018  |
| 4                | 6                | 0              | 3.591377                | -1.264919 | 0.037740  |
| 5                | 6                | 0              | 4.786106                | -0.644256 | -0.333627 |
| 6                | 6                | 0              | 4.868850                | 0.748346  | -0.359149 |
| 7                | 1                | 0              | 3.815415                | 2.603514  | -0.032787 |
| 8                | 1                | 0              | 1.698676                | 1.500743  | 0.630835  |
| 9                | 1                | 0              | 3.525794                | -2.350464 | 0.050638  |
| 10               | 1                | 0              | 5.647459                | -1.248021 | -0.606050 |
| 11               | 1                | 0              | 5.796730                | 1.233518  | -0.649880 |
| 12               | 6                | 0              | 1.186857                | -1.168370 | 0.802422  |
| 13               | 1                | 0              | 1.312044                | -2.252892 | 0.882463  |
| 14               | 1                | 0              | 0.834553                | -0.790555 | 1.770832  |
| 15               | 8                | 0              | 0.164543                | -0.941968 | -0.196261 |
| 16               | 75               | 0              | -1.446759               | -0.018244 | -0.197285 |
| 17               | 8                | 0              | -1.118807               | 1.781245  | 0.370840  |
| 18               | 1                | 0              | -1.550346               | 2.001378  | 1.222330  |
| 19               | 8                | 0              | -2.673112               | -0.193813 | -1.340582 |
| 20               | 6                | 0              | -2.494005               | -0.208177 | 1.601867  |
| 21               | 1                | 0              | -2.952090               | 0.734487  | 1.944672  |
| 22               | 1                | 0              | -3.261687               | -0.984746 | 1.552045  |
| 23               | 1                | 0              | -1.754145               | -0.520915 | 2.354473  |

**MeRe(O)OH(PMe<sub>3</sub>)OCH<sub>2</sub>Ph**

| Center Number | Atomic Number | Atomic Type | Coordinates (Angstroms) |           |           |
|---------------|---------------|-------------|-------------------------|-----------|-----------|
|               |               |             | X                       | Y         | Z         |
| 1             | 8             | 0           | -0.687104               | 0.536288  | -1.724947 |
| 2             | 8             | 0           | -1.563389               | -2.035253 | 0.102925  |
| 3             | 8             | 0           | 1.052748                | -0.959113 | -0.793316 |
| 4             | 6             | 0           | 0.066268                | 0.137338  | 1.704306  |
| 5             | 1             | 0           | -0.063978               | -0.693759 | 2.412392  |
| 6             | 1             | 0           | 1.138456                | 0.340917  | 1.618734  |
| 7             | 1             | 0           | -0.413111               | 1.020536  | 2.146709  |
| 8             | 75            | 0           | -0.761279               | -0.560415 | -0.123503 |
| 9             | 1             | 0           | 0.188492                | 0.367031  | -2.130636 |
| 10            | 6             | 0           | 2.179123                | -1.383947 | -0.065235 |
| 11            | 1             | 0           | 2.555470                | -2.297753 | -0.552246 |
| 12            | 1             | 0           | 1.910427                | -1.675701 | 0.961793  |
| 13            | 15            | 0           | -2.759814               | 0.829116  | 0.239536  |
| 14            | 6             | 0           | -2.375157               | 2.622616  | 0.238247  |
| 15            | 1             | 0           | -1.855975               | 2.859481  | -0.694440 |
| 16            | 1             | 0           | -3.288348               | 3.222674  | 0.317532  |
| 17            | 1             | 0           | -1.712786               | 2.862104  | 1.075661  |
| 18            | 6             | 0           | -3.697414               | 0.542470  | 1.793105  |
| 19            | 1             | 0           | -4.572472               | 1.198966  | 1.861384  |
| 20            | 1             | 0           | -4.026044               | -0.500947 | 1.825297  |
| 21            | 1             | 0           | -3.044374               | 0.721780  | 2.652829  |
| 22            | 6             | 0           | -4.000980               | 0.633623  | -1.098161 |
| 23            | 1             | 0           | -4.854206               | 1.309279  | -0.967655 |
| 24            | 1             | 0           | -3.506609               | 0.840056  | -2.051800 |
| 25            | 1             | 0           | -4.355579               | -0.401723 | -1.111039 |
| 26            | 6             | 0           | 3.305083                | -0.360520 | -0.014999 |
| 27            | 6             | 0           | 4.503821                | -0.689046 | 0.634857  |
| 28            | 6             | 0           | 3.183308                | 0.903348  | -0.599337 |
| 29            | 6             | 0           | 5.554265                | 0.224710  | 0.701771  |
| 30            | 1             | 0           | 4.614309                | -1.671058 | 1.092337  |
| 31            | 6             | 0           | 4.235379                | 1.821781  | -0.534134 |
| 32            | 1             | 0           | 2.259031                | 1.163382  | -1.104379 |
| 33            | 6             | 0           | 5.423255                | 1.487380  | 0.115696  |
| 34            | 1             | 0           | 6.475643                | -0.046993 | 1.210967  |
| 35            | 1             | 0           | 4.123858                | 2.800852  | -0.993889 |
| 36            | 1             | 0           | 6.241152                | 2.201396  | 0.166180  |

**MeRe(O)PMe<sub>3</sub>(OH)O**

| Center Number | Atomic Number | Atomic Type | Coordinates (Angstroms) |           |           |
|---------------|---------------|-------------|-------------------------|-----------|-----------|
|               |               |             | X                       | Y         | Z         |
| 1             | 8             | 0           | 0.222149                | -1.702798 | 0.993857  |
| 2             | 8             | 0           | 0.911295                | 1.626785  | 0.640462  |
| 3             | 8             | 0           | 2.547960                | -0.703876 | 0.429426  |
| 4             | 6             | 0           | 1.026054                | -0.033624 | -1.876931 |
| 5             | 1             | 0           | 2.024399                | 0.261571  | -2.212820 |
| 6             | 1             | 0           | 0.836886                | -1.065850 | -2.198654 |
| 7             | 1             | 0           | 0.272135                | 0.622112  | -2.322139 |
| 8             | 75            | 0           | 0.940769                | -0.034724 | 0.227382  |
| 9             | 1             | 0           | 0.960172                | -2.308782 | 1.184998  |
| 10            | 15            | 0           | -1.708935               | 0.122572  | 0.140491  |
| 11            | 6             | 0           | -2.558833               | -1.309197 | -0.633954 |
| 12            | 1             | 0           | -2.210363               | -2.220583 | -0.140929 |
| 13            | 1             | 0           | -3.648162               | -1.231130 | -0.542867 |
| 14            | 1             | 0           | -2.292480               | -1.367632 | -1.694363 |
| 15            | 6             | 0           | -2.422049               | 1.591381  | -0.707420 |
| 16            | 1             | 0           | -3.515274               | 1.612776  | -0.629191 |
| 17            | 1             | 0           | -2.008305               | 2.499126  | -0.257685 |
| 18            | 1             | 0           | -2.143069               | 1.579771  | -1.765985 |
| 19            | 6             | 0           | -2.424884               | 0.200593  | 1.831581  |
| 20            | 1             | 0           | -3.520262               | 0.236621  | 1.806852  |
| 21            | 1             | 0           | -2.099402               | -0.682723 | 2.388040  |
| 22            | 1             | 0           | -2.046046               | 1.091149  | 2.342950  |

**PhCH<sub>2</sub>(·)**

| Center Number | Atomic Number | Atomic Type | Coordinates (Angstroms) |           |           |
|---------------|---------------|-------------|-------------------------|-----------|-----------|
|               |               |             | X                       | Y         | Z         |
| 1             | 6             | 0           | -1.376711               | 0.633862  | -0.083776 |
| 2             | 6             | 0           | 0.007586                | 0.679921  | -0.130509 |
| 3             | 6             | 0           | 0.707151                | 1.921993  | -0.066401 |
| 4             | 6             | 0           | -0.078099               | 3.108074  | 0.047536  |
| 5             | 6             | 0           | -1.461963               | 3.049721  | 0.093312  |
| 6             | 6             | 0           | -2.124441               | 1.815181  | 0.028309  |
| 7             | 1             | 0           | -1.885728               | -0.325324 | -0.134384 |
| 8             | 1             | 0           | 0.582013                | -0.239161 | -0.217414 |
| 9             | 1             | 0           | 0.430045                | 4.067991  | 0.098352  |
| 10            | 1             | 0           | -2.037221               | 3.967986  | 0.180276  |
| 11            | 1             | 0           | -3.209315               | 1.774221  | 0.064605  |
| 12            | 6             | 0           | 2.111878                | 1.975054  | -0.113568 |
| 13            | 1             | 0           | 2.706668                | 1.071365  | -0.199386 |
| 14            | 1             | 0           | 2.641388                | 2.921037  | -0.064056 |

**MeReO(OH)O (·)**

| Center Number | Atomic Number | Atomic Type | Coordinates (Angstroms) |           |           |
|---------------|---------------|-------------|-------------------------|-----------|-----------|
|               |               |             | X                       | Y         | Z         |
| 1             | 8             | 0           | 0.991461                | 1.564749  | -0.002313 |
| 2             | 8             | 0           | -0.918614               | -0.268226 | 1.483455  |
| 3             | 8             | 0           | -0.920522               | -0.272159 | -1.481687 |
| 4             | 6             | 0           | 1.499849                | -1.285510 | 0.000851  |
| 5             | 1             | 0           | 2.103399                | -1.106186 | -0.895945 |
| 6             | 1             | 0           | 2.103826                | -1.103895 | 0.896876  |
| 7             | 1             | 0           | 1.151437                | -2.322170 | 0.002252  |
| 8             | 75            | 0           | -0.127133               | 0.034701  | -0.000024 |
| 9             | 1             | 0           | 1.958608                | 1.447857  | -0.002097 |

**MeReO<sub>3</sub>**

| Center Number | Atomic Number | Atomic Type | Coordinates (Angstroms) |           |           |
|---------------|---------------|-------------|-------------------------|-----------|-----------|
|               |               |             | X                       | Y         | Z         |
| 1             | 8             | 0           | 0.543909                | 1.664498  | -0.030893 |
| 2             | 8             | 0           | 0.541155                | -0.859857 | -1.426434 |
| 3             | 8             | 0           | 0.541132                | -0.806324 | 1.457365  |
| 4             | 6             | 0           | -2.008979               | 0.001496  | -0.000040 |
| 5             | 1             | 0           | -2.366553               | -0.498802 | 0.905438  |
| 6             | 1             | 0           | -2.365407               | 1.036194  | -0.019248 |
| 7             | 1             | 0           | -2.366543               | -0.532060 | -0.886330 |
| 8             | 75            | 0           | 0.081904                | -0.000011 | 0.000001  |

**PhCH<sub>3</sub>**

| Center<br>Number | Atomic<br>Number | Atomic<br>Type | Coordinates (Angstroms) |           |           |
|------------------|------------------|----------------|-------------------------|-----------|-----------|
|                  |                  |                | X                       | Y         | Z         |
| 1                | 6                | 0              | -1.201444               | 1.205289  | 0.002199  |
| 2                | 6                | 0              | 0.194129                | 1.202402  | -0.008985 |
| 3                | 6                | 0              | 0.913896                | 0.000222  | -0.011389 |
| 4                | 6                | 0              | 0.194385                | -1.202271 | -0.008982 |
| 5                | 6                | 0              | -1.201060               | -1.205493 | 0.002198  |
| 6                | 6                | 0              | -1.905116               | -0.000141 | 0.008471  |
| 7                | 1                | 0              | -1.739014               | 2.150176  | 0.001555  |
| 8                | 1                | 0              | 0.734218                | 2.146899  | -0.017836 |
| 9                | 1                | 0              | 0.734728                | -2.146640 | -0.017849 |
| 10               | 1                | 0              | -1.738458               | -2.150479 | 0.001552  |
| 11               | 1                | 0              | -2.991869               | -0.000325 | 0.013921  |
| 12               | 6                | 0              | 2.425551                | 0.000097  | 0.009375  |
| 13               | 1                | 0              | 2.809992                | -0.012911 | 1.038355  |
| 14               | 1                | 0              | 2.834300                | -0.879700 | -0.499566 |
| 15               | 1                | 0              | 2.834048                | 0.892352  | -0.477447 |

**Electronic Energies for species in Figure 1 (Hartrees)**

|                                                      |             |
|------------------------------------------------------|-------------|
| PhCH <sub>2</sub> OH                                 | -346.76763  |
| MeReO <sub>2</sub> (D)                               | -269.45828  |
| (PhCH <sub>2</sub> OH)ReMeO <sub>2</sub> (E)         | -616.25844  |
| (PhCH <sub>2</sub> O)ReMeO(OH) (A)                   | -616.27151  |
| MeRe(O)OH(PMe <sub>3</sub> )OCH <sub>2</sub> Ph (A') | -1077.43788 |
| MeRe(O)PMe <sub>3</sub> (OH)O· (F')                  | -806.44649  |
| MeReO <sub>3</sub>                                   | -344.74852  |
| PhCH <sub>3</sub>                                    | -271.56665  |
| MeReO <sub>2</sub> OH (F)                            | -345.33628  |
| PhCH <sub>2</sub> (·)                                | -270.91514  |
